# Supplementary material
Source: PubMed Central journal article supplement (PMC5192948)
Supplement: BPH-174-163-s003.pdf [file BPH-174-163-s003.pdf]

### 3 d Functional Annotation Chart

Input proteins: 181 significantly regulated proteins

Criteria: Fold enrichment > 1.5 and p-value < 0.05

132 terms were identified, table is sorted by p-value

| Term                                                                               | Category        | Number of terms | % of input proteins | Fold enrichment | p-value  |
|------------------------------------------------------------------------------------|-----------------|-----------------|---------------------|-----------------|----------|
| Ribosome                                                                           | KEGG_PATHWAY    | 24              | 13,95               | 16,64           | 1,41E-22 |
| Ribosomal protein                                                                  | SP_PIR_KEYWORDS | 24              | 13,95               | 14,24           | 7,35E-20 |
| Structural constituent of ribosome                                                 | GOTERM_MF_FAT   | 23              | 13,37               | 14,15           | 3,75E-19 |
| Acetylation                                                                        | SP_PIR_KEYWORDS | 69              | 40,12               | 3,12            | 5,20E-19 |
| Translation                                                                        | GOTERM_BP_FAT   | 29              | 16,86               | 8,76            | 1,41E-18 |
| Ribosome                                                                           | GOTERM_CC_FAT   | 24              | 13,95               | 11,84           | 2,80E-18 |
| Ribonucleoprotein                                                                  | SP_PIR_KEYWORDS | 26              | 15,12               | 10,27           | 4,69E-18 |
| Ribonucleoprotein complex                                                          | GOTERM_CC_FAT   | 29              | 16,86               | 5,95            | 2,88E-14 |
| Structural molecule activity                                                       | GOTERM_MF_FAT   | 29              | 16,86               | 5,99            | 2,92E-14 |
| Phosphoprotein                                                                     | SP_PIR_KEYWORDS | 99              | 57,56               | 1,65            | 1,41E-09 |
| Protein biosynthesis                                                               | SP_PIR_KEYWORDS | 13              | 7,56                | 9,82            | 8,24E-09 |
| Ribosome                                                                           | SP_PIR_KEYWORDS | 7               | 4,07                | 31,96           | 5,81E-08 |
| Cytoplasm                                                                          | SP_PIR_KEYWORDS | 57              | 33,14               | 1,98            | 2,08E-07 |
| Intracellular non-membrane-bounded organelle                                       | GOTERM_CC_FAT   | 41              | 23,84               | 2,02            | 8,06E-06 |
| Non-membrane-bounded organelle                                                     | GOTERM_CC_FAT   | 41              | 23,84               | 2,02            | 8,06E-06 |
| Small ribosomal subunit                                                            | GOTERM_CC_FAT   | 6               | 3,49                | 19,60           | 1,13E-05 |
| Coenzyme metabolic process                                                         | GOTERM_BP_FAT   | 10              | 5,81                | 6,74            | 1,67E-05 |
| Oxidation reduction                                                                | GOTERM_BP_FAT   | 21              | 12,21               | 3,01            | 1,78E-05 |
| Mitochondrion                                                                      | SP_PIR_KEYWORDS | 22              | 12,79               | 2,92            | 1,89E-05 |
| Cytosolic ribosome                                                                 | GOTERM_CC_FAT   | 5               | 2,91                | 26,31           | 3,14E-05 |
| Ribosomal subunit                                                                  | GOTERM_CC_FAT   | 7               | 4,07                | 10,05           | 6,40E-05 |
| Mitochondrion                                                                      | GOTERM_CC_FAT   | 30              | 17,44               | 2,15            | 8,39E-05 |
| Glutathione metabolic process                                                      | GOTERM_BP_FAT   | 5               | 2,91                | 20,08           | 9,77E-05 |
| Oxidoreductase                                                                     | SP_PIR_KEYWORDS | 17              | 9,88                | 3,12            | 1,10E-04 |
| Cofactor metabolic process                                                         | GOTERM_BP_FAT   | 10              | 5,81                | 5,29            | 1,11E-04 |
| rRNA binding                                                                       | GOTERM_MF_FAT   | 5               | 2,91                | 19,36           | 1,12E-04 |
| Mitochondrial part                                                                 | GOTERM_CC_FAT   | 17              | 9,88                | 3,07            | 1,15E-04 |
| Transit peptide                                                                    | SP_PIR_KEYWORDS | 15              | 8,72                | 3,45            | 1,17E-04 |
| Translation, ribosomal structure and biogenesis                                    | COG_ONTOLOGY    | 7               | 4,07                | 7,96            | 1,28E-04 |
| Mitochondrion                                                                      | UP_SEQ_FEATURE  | 15              | 8,72                | 3,17            | 2,78E-04 |
| Mitochondrial lumen                                                                | GOTERM_CC_FAT   | 9               | 5,23                | 5,23            | 3,13E-04 |
| Mitochondrial matrix                                                               | GOTERM_CC_FAT   | 9               | 5,23                | 5,23            | 3,13E-04 |
| rRNA-binding                                                                       | SP_PIR_KEYWORDS | 4               | 2,33                | 28,01           | 3,49E-04 |
| Generation of precursor metabolites and energy                                     | GOTERM_BP_FAT   | 11              | 6,40                | 4,06            | 3,70E-04 |
| Ligase                                                                             | SP_PIR_KEYWORDS | 11              | 6,40                | 3,98            | 4,52E-04 |
| Aminoacyl-tRNA synthetase                                                          | SP_PIR_KEYWORDS | 5               | 2,91                | 13,46           | 4,92E-04 |
| Valine, leucine and isoleucine biosynthesis                                        | KEGG_PATHWAY    | 4               | 2,33                | 22,44           | 6,00E-04 |
| Peptide metabolic process                                                          | GOTERM_BP_FAT   | 5               | 2,91                | 12,68           | 6,07E-04 |
| Cytosol                                                                            | GOTERM_CC_FAT   | 16              | 9,30                | 2,76            | 6,20E-04 |
| tRNA aminoacylation for protein translation                                        | GOTERM_BP_FAT   | 5               | 2,91                | 10,47           | 1,26E-03 |
| tRNA aminoacylation                                                                | GOTERM_BP_FAT   | 5               | 2,91                | 10,47           | 1,26E-03 |
| Amino acid activation                                                              | GOTERM_BP_FAT   | 5               | 2,91                | 10,47           | 1,26E-03 |
| Glutathione metabolism                                                             | KEGG_PATHWAY    | 6               | 3,49                | 7,12            | 1,36E-03 |
| Organelle inner membrane                                                           | GOTERM_CC_FAT   | 11              | 6,40                | 3,34            | 1,63E-03 |
| Aminoacyl-tRNA ligase activity                                                     | GOTERM_MF_FAT   | 5               | 2,91                | 9,68            | 1,69E-03 |
| Ligase activity, forming aminoacyl-tRNA and related compounds                      | GOTERM_MF_FAT   | 5               | 2,91                | 9,68            | 1,69E-03 |
| Ligase activity, forming carbon-oxygen bonds                                       | GOTERM_MF_FAT   | 5               | 2,91                | 9,68            | 1,69E-03 |
| Nucleic acid-binding, OB-fold                                                      | INTERPRO        | 5               | 2,91                | 9,28            | 2,02E-03 |
| Response to oxidative stress                                                       | GOTERM_BP_FAT   | 6               | 3,49                | 6,65            | 2,03E-03 |
| AMP-dependent synthetase and ligase                                                | INTERPRO        | 4               | 2,33                | 14,35           | 2,61E-03 |
| Fatty acid metabolism                                                              | SP_PIR_KEYWORDS | 5               | 2,91                | 8,61            | 2,66E-03 |
| Cofactor binding                                                                   | GOTERM_MF_FAT   | 9               | 5,23                | 3,70            | 2,95E-03 |
| Acetyl-CoA metabolic process                                                       | GOTERM_BP_FAT   | 4               | 2,33                | 12,43           | 3,90E-03 |
| Mitochondrial inner membrane                                                       | GOTERM_CC_FAT   | 10              | 5,81                | 3,20            | 3,93E-03 |
| Aminoacyl-tRNA biosynthesis                                                        | KEGG_PATHWAY    | 5               | 2,91                | 7,35            | 4,35E-03 |
| Regulation of epithelial cell proliferation involved in prostate gland development | GOTERM_BP_FAT   | 3               | 1,74                | 28,91           | 4,49E-03 |
| Mitochondrial membrane                                                             | GOTERM_CC_FAT   | 11              | 6,40                | 2,83            | 5,31E-03 |
| Actin-binding                                                                      | SP_PIR_KEYWORDS | 8               | 4,65                | 3,72            | 5,81E-03 |
| Valine, leucine and isoleucine degradation                                         | KEGG_PATHWAY    | 5               | 2,91                | 6,71            | 6,04E-03 |
| RNA binding                                                                        | SP_PIR_KEYWORDS | 3               | 1,74                | 24,24           | 6,49E-03 |
| RNA-binding                                                                        | SP_PIR_KEYWORDS | 12              | 6,98                | 2,60            | 6,56E-03 |
| Nucleotide binding                                                                 | GOTERM_MF_FAT   | 36              | 20,93               | 1,53            | 7,49E-03 |
| Mitochondrial envelope                                                             | GOTERM_CC_FAT   | 11              | 6,40                | 2,66            | 8,02E-03 |
| Vitamin binding                                                                    | GOTERM_MF_FAT   | 6               | 3,49                | 4,61            | 9,60E-03 |
| "KMSKS" region                                                                     | UP_SEQ_FEATURE  | 3               | 1,74                | 18,96           | 1,05E-02 |
| Nucleotide-binding                                                                 | SP_PIR_KEYWORDS | 26              | 15,12               | 1,67            | 1,09E-02 |
| Organelle envelope                                                                 | GOTERM_CC_FAT   | 13              | 7,56                | 2,28            | 1,11E-02 |

|                                                                                      |                 |    |       |       |          |
|--------------------------------------------------------------------------------------|-----------------|----|-------|-------|----------|
| Envelope                                                                             | GOTERM_CC_FAT   | 13 | 7,56  | 2,27  | 1,14E-02 |
| Proteoglycan                                                                         | SP_PIR_KEYWORDS | 4  | 2,33  | 8,40  | 1,18E-02 |
| Actin binding                                                                        | GOTERM_MF_FAT   | 9  | 5,23  | 2,90  | 1,22E-02 |
| RNA binding                                                                          | GOTERM_MF_FAT   | 15 | 8,72  | 2,07  | 1,27E-02 |
| Citrate cycle (TCA cycle)                                                            | KEGG_PATHWAY    | 4  | 2,33  | 7,96  | 1,30E-02 |
| Blood vessel development                                                             | GOTERM_BP_FAT   | 8  | 4,65  | 3,16  | 1,32E-02 |
| Cytoskeletal protein binding                                                         | GOTERM_MF_FAT   | 11 | 6,40  | 2,47  | 1,34E-02 |
| "HIGH" region                                                                        | UP_SEQ_FEATURE  | 3  | 1,74  | 16,73 | 1,34E-02 |
| Tricarboxylic acid cycle                                                             | SP_PIR_KEYWORDS | 3  | 1,74  | 16,58 | 1,37E-02 |
| Proteasome                                                                           | SP_PIR_KEYWORDS | 4  | 2,33  | 7,78  | 1,45E-02 |
| Vasculature development                                                              | GOTERM_BP_FAT   | 8  | 4,65  | 3,08  | 1,49E-02 |
| Electron transport                                                                   | SP_PIR_KEYWORDS | 5  | 2,91  | 5,25  | 1,50E-02 |
| Sulfur metabolic process                                                             | GOTERM_BP_FAT   | 5  | 2,91  | 5,13  | 1,61E-02 |
| Posttranslational modification, protein turnover, chaperones                         | COG_ONTOLOGY    | 6  | 3,49  | 3,71  | 1,67E-02 |
| Thioredoxin fold                                                                     | INTERPRO        | 5  | 2,91  | 5,08  | 1,68E-02 |
| Energy derivation by oxidation of organic compounds                                  | GOTERM_BP_FAT   | 5  | 2,91  | 4,92  | 1,85E-02 |
| ATP-binding                                                                          | SP_PIR_KEYWORDS | 21 | 12,21 | 1,71  | 1,95E-02 |
| Repeat:1                                                                             | UP_SEQ_FEATURE  | 6  | 3,49  | 3,84  | 1,99E-02 |
| Soluble fraction                                                                     | GOTERM_CC_FAT   | 5  | 2,91  | 4,78  | 2,02E-02 |
| Angiogenesis                                                                         | SP_PIR_KEYWORDS | 4  | 2,33  | 6,78  | 2,10E-02 |
| Repeat:2                                                                             | UP_SEQ_FEATURE  | 6  | 3,49  | 3,77  | 2,15E-02 |
| Repeat:4                                                                             | UP_SEQ_FEATURE  | 5  | 2,91  | 4,69  | 2,17E-02 |
| Proteasome complex                                                                   | GOTERM_CC_FAT   | 4  | 2,33  | 6,53  | 2,28E-02 |
| Repeat:8                                                                             | UP_SEQ_FEATURE  | 4  | 2,33  | 6,54  | 2,29E-02 |
| Positive regulation of phagocytosis                                                  | GOTERM_BP_FAT   | 3  | 1,74  | 12,57 | 2,31E-02 |
| Tricarboxylic acid cycle                                                             | GOTERM_BP_FAT   | 3  | 1,74  | 12,57 | 2,31E-02 |
| Acetyl-CoA catabolic process                                                         | GOTERM_BP_FAT   | 3  | 1,74  | 12,05 | 2,51E-02 |
| Binding site: NADP                                                                   | UP_SEQ_FEATURE  | 3  | 1,74  | 11,85 | 2,59E-02 |
| Regulation of phagocytosis                                                           | GOTERM_BP_FAT   | 3  | 1,74  | 11,56 | 2,71E-02 |
| Regulation of epithelial cell proliferation                                          | GOTERM_BP_FAT   | 4  | 2,33  | 6,12  | 2,71E-02 |
| Duplication                                                                          | SP_PIR_KEYWORDS | 5  | 2,91  | 4,38  | 2,73E-02 |
| Pyruvate metabolism                                                                  | KEGG_PATHWAY    | 4  | 2,33  | 6,02  | 2,74E-02 |
| Glyoxylate bypass                                                                    | SP_PIR_KEYWORDS | 2  | 1,16  | 70,02 | 2,81E-02 |
| Coenzyme biosynthetic process                                                        | GOTERM_BP_FAT   | 4  | 2,33  | 6,02  | 2,83E-02 |
| Cytosolic part                                                                       | GOTERM_CC_FAT   | 4  | 2,33  | 6,01  | 2,83E-02 |
| Electron transport chain                                                             | GOTERM_BP_FAT   | 5  | 2,91  | 4,30  | 2,85E-02 |
| Coenzyme binding                                                                     | GOTERM_MF_FAT   | 6  | 3,49  | 3,48  | 2,86E-02 |
| tRNA metabolic process                                                               | GOTERM_BP_FAT   | 5  | 2,91  | 4,26  | 2,94E-02 |
| Glutathione S-transferase, C-terminal-like                                           | INTERPRO        | 3  | 1,74  | 10,77 | 3,11E-02 |
| Aerobic respiration                                                                  | GOTERM_BP_FAT   | 3  | 1,74  | 10,71 | 3,13E-02 |
| Cross-link: Glycyl lysine isopeptide (Lys-Gly) (interchain with G-Cter in ubiquitin) | UP_SEQ_FEATURE  | 6  | 3,49  | 3,39  | 3,21E-02 |
| Repeat:7                                                                             | UP_SEQ_FEATURE  | 4  | 2,33  | 5,66  | 3,33E-02 |
| Fatty acid metabolism                                                                | KEGG_PATHWAY    | 4  | 2,33  | 5,48  | 3,49E-02 |
| Adenyl nucleotide binding                                                            | GOTERM_MF_FAT   | 25 | 14,53 | 1,51  | 3,55E-02 |
| Coenzyme catabolic process                                                           | GOTERM_BP_FAT   | 3  | 1,74  | 9,97  | 3,57E-02 |
| Ligase activity, forming carbon-sulfur bonds                                         | GOTERM_MF_FAT   | 3  | 1,74  | 9,96  | 3,58E-02 |
| Class II aldolase/adducin, N-terminal                                                | INTERPRO        | 2  | 1,16  | 53,83 | 3,64E-02 |
| Microvillus                                                                          | GOTERM_CC_FAT   | 3  | 1,74  | 9,80  | 3,68E-02 |
| Plasminogen activation                                                               | SP_PIR_KEYWORDS | 2  | 1,16  | 52,51 | 3,73E-02 |
| Epithelial cell differentiation                                                      | GOTERM_BP_FAT   | 5  | 2,91  | 3,92  | 3,83E-02 |
| Repeat:6                                                                             | UP_SEQ_FEATURE  | 4  | 2,33  | 5,34  | 3,85E-02 |
| Purine nucleoside binding                                                            | GOTERM_MF_FAT   | 25 | 14,53 | 1,50  | 3,87E-02 |
| Proteasome                                                                           | KEGG_PATHWAY    | 4  | 2,33  | 5,25  | 3,90E-02 |
| Aminoacyl-tRNA synthetase, class I, conserved site                                   | INTERPRO        | 3  | 1,74  | 9,50  | 3,92E-02 |
| Glutathione S-transferase/chloride channel, C-terminal                               | INTERPRO        | 3  | 1,74  | 9,50  | 3,92E-02 |
| Lipid metabolism                                                                     | SP_PIR_KEYWORDS | 5  | 2,91  | 3,86  | 4,04E-02 |
| Extracellular space                                                                  | GOTERM_CC_FAT   | 11 | 6,40  | 2,04  | 4,21E-02 |
| Cofactor catabolic process                                                           | GOTERM_BP_FAT   | 3  | 1,74  | 9,03  | 4,27E-02 |
| Reproductive structure development                                                   | GOTERM_BP_FAT   | 5  | 2,91  | 3,71  | 4,54E-02 |
| NADP                                                                                 | SP_PIR_KEYWORDS | 5  | 2,91  | 3,70  | 4,59E-02 |
| Enzyme inhibitor activity                                                            | GOTERM_MF_FAT   | 7  | 4,07  | 2,68  | 4,62E-02 |
| GST C-terminal                                                                       | UP_SEQ_FEATURE  | 3  | 1,74  | 8,62  | 4,67E-02 |
| Positive regulation of endocytosis                                                   | GOTERM_BP_FAT   | 3  | 1,74  | 8,50  | 4,77E-02 |
| Isopeptide bond                                                                      | SP_PIR_KEYWORDS | 7  | 4,07  | 2,65  | 4,83E-02 |
| Angiogenesis                                                                         | GOTERM_BP_FAT   | 5  | 2,91  | 3,62  | 4,86E-02 |

#### 6 d Functional Annotation Chart

Input proteins: 158 significantly regulated proteins

Criteria: Fold enrichment > 1.5 and p-value < 0.05

105 terms were identified, table is sorted by p-value

| Term                                                   | Category        | Number of terms | % of input | prc Fold enrichment | p-value  |
|--------------------------------------------------------|-----------------|-----------------|------------|---------------------|----------|
| Ribosome                                               | KEGG_PATHWAY    | 21              | 13,82      | 16,51               | 1,49E-19 |
| Translation                                            | GOTERM_BP_FAT   | 28              | 18,42      | 9,86                | 2,34E-19 |
| Ribosomal protein                                      | SP_PIR_KEYWORDS | 21              | 13,82      | 13,94               | 3,65E-17 |
| Structural constituent of ribosome                     | GOTERM_MF_FAT   | 20              | 13,16      | 14,55               | 7,46E-17 |
| Acetylation                                            | SP_PIR_KEYWORDS | 61              | 40,13      | 3,08                | 1,20E-16 |
| Ribosome                                               | GOTERM_CC_FAT   | 21              | 13,82      | 11,59               | 9,61E-16 |
| Ribonucleoprotein                                      | SP_PIR_KEYWORDS | 21              | 13,82      | 9,27                | 1,04E-13 |
| Structural molecule activity                           | GOTERM_MF_FAT   | 23              | 15,13      | 5,61                | 7,97E-11 |
| Protein biosynthesis                                   | SP_PIR_KEYWORDS | 14              | 9,21       | 11,83               | 1,75E-10 |
| Ribonucleoprotein complex                              | GOTERM_CC_FAT   | 23              | 15,13      | 5,28                | 2,47E-10 |
| Cytoplasm                                              | SP_PIR_KEYWORDS | 53              | 34,87      | 2,06                | 1,40E-07 |
| Ribosome                                               | SP_PIR_KEYWORDS | 6               | 3,95       | 30,64               | 1,20E-06 |
| Phosphoprotein                                         | SP_PIR_KEYWORDS | 81              | 53,29      | 1,51                | 6,43E-06 |
| LIM                                                    | SMART           | 7               | 4,61       | 12,52               | 1,70E-05 |
| Aminoacyl-tRNA synthetase                              | SP_PIR_KEYWORDS | 6               | 3,95       | 18,07               | 1,85E-05 |
| Intracellular non-membrane-bounded organelle           | GOTERM_CC_FAT   | 37              | 24,34      | 2,04                | 1,87E-05 |
| Non-membrane-bounded organelle                         | GOTERM_CC_FAT   | 37              | 24,34      | 2,04                | 1,87E-05 |
| Zinc finger, LIM-type                                  | INTERPRO        | 7               | 4,61       | 11,51               | 3,13E-05 |
| LIM domain                                             | SP_PIR_KEYWORDS | 7               | 4,61       | 11,26               | 3,54E-05 |
| Amino acid activation                                  | GOTERM_BP_FAT   | 6               | 3,95       | 14,65               | 5,07E-05 |
| tRNA aminoacylation for protein translation            | GOTERM_BP_FAT   | 6               | 3,95       | 14,65               | 5,07E-05 |
| tRNA aminoacylation                                    | GOTERM_BP_FAT   | 6               | 3,95       | 14,65               | 5,07E-05 |
| rRNA binding                                           | GOTERM_MF_FAT   | 5               | 3,29       | 22,88               | 5,84E-05 |
| Ligase activity, forming aminoacyl-tRNA and related co | GOTERM_MF_FAT   | 6               | 3,95       | 13,73               | 6,94E-05 |
| Ligase activity, forming carbon-oxygen bonds           | GOTERM_MF_FAT   | 6               | 3,95       | 13,73               | 6,94E-05 |
| Aminoacyl-tRNA ligase activity                         | GOTERM_MF_FAT   | 6               | 3,95       | 13,73               | 6,94E-05 |
| LIM zinc-binding 3                                     | UP_SEQ_FEATURE  | 5               | 3,29       | 20,27               | 9,65E-05 |
| rRNA-binding                                           | SP_PIR_KEYWORDS | 4               | 2,63       | 31,32               | 2,50E-04 |
| Aminoacyl-tRNA biosynthesis                            | KEGG_PATHWAY    | 6               | 3,95       | 10,00               | 2,80E-04 |
| Plasminogen activation                                 | SP_PIR_KEYWORDS | 3               | 1,97       | 88,10               | 4,22E-04 |
| Cytosolic ribosome                                     | GOTERM_CC_FAT   | 4               | 2,63       | 23,55               | 5,88E-04 |
| Translation, ribosomal structure and biogenesis        | COG_ONTOLOGY    | 5               | 3,29       | 9,24                | 1,24E-03 |
| LIM zinc-binding 2                                     | UP_SEQ_FEATURE  | 5               | 3,29       | 10,54               | 1,25E-03 |
| LIM zinc-binding 1                                     | UP_SEQ_FEATURE  | 5               | 3,29       | 10,54               | 1,25E-03 |
| Coenzyme metabolic process                             | GOTERM_BP_FAT   | 7               | 4,61       | 5,50                | 1,67E-03 |
| Small ribosomal subunit                                | GOTERM_CC_FAT   | 4               | 2,63       | 14,62               | 2,44E-03 |
| Aminoacyl-tRNA synthetase, class I, conserved site     | INTERPRO        | 4               | 2,63       | 14,31               | 2,65E-03 |
| tRNA metabolic process                                 | GOTERM_BP_FAT   | 6               | 3,95       | 5,96                | 3,25E-03 |
| Ribosomal subunit                                      | GOTERM_CC_FAT   | 5               | 3,29       | 8,03                | 3,36E-03 |
| Actin cytoskeleton organization                        | GOTERM_BP_FAT   | 7               | 4,61       | 4,76                | 3,42E-03 |
| Actin binding                                          | GOTERM_MF_FAT   | 9               | 5,92       | 3,43                | 4,58E-03 |
| LIM zinc-binding 4                                     | UP_SEQ_FEATURE  | 3               | 1,97       | 28,75               | 4,59E-03 |
| Actin filament-based process                           | GOTERM_BP_FAT   | 7               | 4,61       | 4,47                | 4,69E-03 |
| Cofactor metabolic process                             | GOTERM_BP_FAT   | 7               | 4,61       | 4,32                | 5,51E-03 |
| Fibrinolysis Pathway                                   | BIOCARTA        | 3               | 1,97       | 23,11               | 5,92E-03 |
| "KMSKS" region                                         | UP_SEQ_FEATURE  | 3               | 1,97       | 21,08               | 8,55E-03 |
| ncRNA metabolic process                                | GOTERM_BP_FAT   | 7               | 4,61       | 3,89                | 9,02E-03 |
| Oxidoreductase                                         | SP_PIR_KEYWORDS | 12              | 7,89       | 2,46                | 9,43E-03 |
| TSP1                                                   | SMART           | 4               | 2,63       | 8,97                | 9,54E-03 |
| Valine, leucine and isoleucine biosynthesis            | KEGG_PATHWAY    | 3               | 1,97       | 19,08               | 9,97E-03 |
| "HIGH" region                                          | UP_SEQ_FEATURE  | 3               | 1,97       | 18,60               | 1,09E-02 |
| Tricarboxylic acid cycle                               | SP_PIR_KEYWORDS | 3               | 1,97       | 18,55               | 1,11E-02 |
| Ligase                                                 | SP_PIR_KEYWORDS | 8               | 5,26       | 3,24                | 1,18E-02 |
| Nucleic acid-binding, OB-fold                          | INTERPRO        | 4               | 2,63       | 8,39                | 1,18E-02 |
| Thrombospondin, type 1 repeat                          | INTERPRO        | 4               | 2,63       | 8,25                | 1,24E-02 |
| Pept_C1                                                | SMART           | 3               | 1,97       | 17,26               | 1,25E-02 |
| Actin-binding                                          | SP_PIR_KEYWORDS | 7               | 4,61       | 3,64                | 1,26E-02 |
| Cytoskeletal protein binding                           | GOTERM_MF_FAT   | 10              | 6,58       | 2,65                | 1,27E-02 |
| Cytosol                                                | GOTERM_CC_FAT   | 12              | 7,89       | 2,32                | 1,37E-02 |
| Endopeptidase activity                                 | GOTERM_MF_FAT   | 10              | 6,58       | 2,61                | 1,40E-02 |
| Peptidase C1A, papain C-terminal                       | INTERPRO        | 3               | 1,97       | 15,87               | 1,50E-02 |
| Oxidation reduction                                    | GOTERM_BP_FAT   | 13              | 8,55       | 2,17                | 1,56E-02 |
| Cell adhesion                                          | SP_PIR_KEYWORDS | 9               | 5,92       | 2,78                | 1,57E-02 |
| Tricarboxylic acid cycle                               | GOTERM_BP_FAT   | 3               | 1,97       | 14,65               | 1,73E-02 |
| Prevents secretion from ER                             | UP_SEQ_FEATURE  | 4               | 2,63       | 7,15                | 1,82E-02 |
| Glutathione metabolic process                          | GOTERM_BP_FAT   | 3               | 1,97       | 14,04               | 1,88E-02 |
| Acetyl-CoA catabolic process                           | GOTERM_BP_FAT   | 3               | 1,97       | 14,04               | 1,88E-02 |

|                                                            |                 |    |      |       |          |
|------------------------------------------------------------|-----------------|----|------|-------|----------|
| Peptidase C1A, papain                                      | INTERPRO        | 3  | 1,97 | 13,52 | 2,03E-02 |
| Cytoplasmic vesicle                                        | GOTERM_CC_FAT   | 11 | 7,24 | 2,29  | 2,07E-02 |
| Glyoxylate and dicarboxylate metabolism                    | KEGG_PATHWAY    | 3  | 1,97 | 13,12 | 2,08E-02 |
| Cytosolic part                                             | GOTERM_CC_FAT   | 4  | 2,63 | 6,73  | 2,11E-02 |
| Aerobic respiration                                        | GOTERM_BP_FAT   | 3  | 1,97 | 12,48 | 2,35E-02 |
| Vesicle                                                    | GOTERM_CC_FAT   | 11 | 7,24 | 2,25  | 2,36E-02 |
| Carbohydrate binding                                       | GOTERM_MF_FAT   | 8  | 5,26 | 2,77  | 2,48E-02 |
| Cysteine proteinase                                        | SP_PIR_KEYWORDS | 2  | 1,32 | 78,31 | 2,52E-02 |
| Glyoxylate bypass                                          | SP_PIR_KEYWORDS | 2  | 1,32 | 78,31 | 2,52E-02 |
| Protein folding                                            | GOTERM_BP_FAT   | 5  | 3,29 | 4,42  | 2,61E-02 |
| Thrombin signaling and protease-activated receptors        | BIOCARTA        | 3  | 1,97 | 10,88 | 2,65E-02 |
| Cytoskeleton                                               | SP_PIR_KEYWORDS | 11 | 7,24 | 2,22  | 2,65E-02 |
| TSP type-1 3                                               | UP_SEQ_FEATURE  | 3  | 1,97 | 11,71 | 2,66E-02 |
| Coenzyme catabolic process                                 | GOTERM_BP_FAT   | 3  | 1,97 | 11,62 | 2,69E-02 |
| Zymogen                                                    | SP_PIR_KEYWORDS | 6  | 3,95 | 3,54  | 2,71E-02 |
| Proteasomal protein catabolic process                      | GOTERM_BP_FAT   | 3  | 1,97 | 11,23 | 2,86E-02 |
| Proteasomal ubiquitin-dependent protein catabolic process  | GOTERM_BP_FAT   | 3  | 1,97 | 11,23 | 2,86E-02 |
| Endoplasmic reticulum lumen                                | GOTERM_CC_FAT   | 4  | 2,63 | 5,89  | 2,99E-02 |
| Acetyl-CoA metabolic process                               | GOTERM_BP_FAT   | 3  | 1,97 | 10,87 | 3,04E-02 |
| Calponin                                                   | INTERPRO        | 2  | 1,32 | 60,83 | 3,23E-02 |
| Cofactor catabolic process                                 | GOTERM_BP_FAT   | 3  | 1,97 | 10,53 | 3,23E-02 |
| Rho cell motility signaling pathway                        | BIOCARTA        | 3  | 1,97 | 9,73  | 3,27E-02 |
| Lysosome                                                   | SP_PIR_KEYWORDS | 5  | 3,29 | 4,08  | 3,38E-02 |
| Glutathione metabolism                                     | KEGG_PATHWAY    | 4  | 2,63 | 5,38  | 3,65E-02 |
| Antigen processing and presentation                        | KEGG_PATHWAY    | 5  | 3,29 | 3,84  | 3,91E-02 |
| Guanine nucleotide-binding protein, beta subunit           | INTERPRO        | 2  | 1,32 | 48,67 | 4,02E-02 |
| Cytoplasmic membrane-bounded vesicle                       | GOTERM_CC_FAT   | 9  | 5,92 | 2,30  | 4,04E-02 |
| Response to oxidative stress                               | GOTERM_BP_FAT   | 4  | 2,63 | 5,16  | 4,17E-02 |
| Rossmann-like alpha/beta/alpha sandwich fold               | INTERPRO        | 3  | 1,97 | 9,12  | 4,22E-02 |
| Membrane-bounded vesicle                                   | GOTERM_CC_FAT   | 9  | 5,92 | 2,27  | 4,33E-02 |
| Peptide metabolic process                                  | GOTERM_BP_FAT   | 3  | 1,97 | 8,87  | 4,42E-02 |
| RPTP-like protein binding                                  | GOTERM_MF_FAT   | 2  | 1,32 | 43,93 | 4,44E-02 |
| TSP type-1 2                                               | UP_SEQ_FEATURE  | 3  | 1,97 | 8,78  | 4,51E-02 |
| TSP type-1 1                                               | UP_SEQ_FEATURE  | 3  | 1,97 | 8,78  | 4,51E-02 |
| Aminoacyl-tRNA synthetase, class Ia                        | INTERPRO        | 2  | 1,32 | 40,55 | 4,80E-02 |
| Valyl/Leucyl/Isoleucyl-tRNA synthetase, class I, anticodon | INTERPRO        | 2  | 1,32 | 40,55 | 4,80E-02 |
| Endoplasmic reticulum, targeting sequence                  | INTERPRO        | 3  | 1,97 | 8,49  | 4,81E-02 |
| Protein degradation                                        | SP_PIR_KEYWORDS | 2  | 1,32 | 39,15 | 4,97E-02 |

#### 9 d Functional Annotation Chart

Input proteins: 363 significantly regulated proteins

Criteria: Fold enrichment > 1.5 and p-value < 0.05

271 terms were identified, table is sorted by p-value

| Term                                                        | Category        | Number of terms | % of input | prc Fold enrichment | p-value  |
|-------------------------------------------------------------|-----------------|-----------------|------------|---------------------|----------|
| Acetylation                                                 | SP_PIR_KEYWORDS | 136             | 39,08      | 3,03                | 4,40E-35 |
| Ribosome                                                    | KEGG_PATHWAY    | 33              | 9,48       | 11,82               | 1,28E-26 |
| Translation                                                 | GOTERM_BP_FAT   | 44              | 12,64      | 6,67                | 3,23E-23 |
| Structural constituent of ribosome                          | GOTERM_MF_FAT   | 32              | 9,20       | 10,17               | 2,06E-22 |
| Ribosomal protein                                           | SP_PIR_KEYWORDS | 33              | 9,48       | 9,65                | 3,82E-22 |
| Ribonucleoprotein                                           | SP_PIR_KEYWORDS | 37              | 10,63      | 7,20                | 2,18E-20 |
| Ribosome                                                    | GOTERM_CC_FAT   | 33              | 9,48       | 8,02                | 7,01E-20 |
| Structural molecule activity                                | GOTERM_MF_FAT   | 43              | 12,36      | 4,58                | 1,43E-16 |
| Cytoplasm                                                   | SP_PIR_KEYWORDS | 118             | 33,91      | 2,02                | 7,58E-15 |
| Ribonucleoprotein complex                                   | GOTERM_CC_FAT   | 41              | 11,78      | 4,14                | 2,85E-14 |
| Proteasome                                                  | SP_PIR_KEYWORDS | 15              | 4,31       | 14,38               | 1,21E-12 |
| Protein biosynthesis                                        | SP_PIR_KEYWORDS | 21              | 6,03       | 7,82                | 2,54E-12 |
| Proteasome complex                                          | GOTERM_CC_FAT   | 15              | 4,31       | 12,07               | 1,28E-11 |
| Cytosol                                                     | GOTERM_CC_FAT   | 39              | 11,21      | 3,31                | 1,22E-10 |
| Ribosome                                                    | SP_PIR_KEYWORDS | 10              | 2,87       | 22,50               | 2,12E-10 |
| LIM                                                         | SMART           | 14              | 4,02       | 10,60               | 4,37E-10 |
| Proteasome                                                  | KEGG_PATHWAY    | 14              | 4,02       | 9,50                | 9,56E-10 |
| Zinc finger, LIM-type                                       | INTERPRO        | 14              | 4,02       | 10,12               | 9,73E-10 |
| LIM domain                                                  | SP_PIR_KEYWORDS | 14              | 4,02       | 9,92                | 1,23E-09 |
| LIM zinc-binding 2                                          | UP_SEQ_FEATURE  | 12              | 3,45       | 11,18               | 6,54E-09 |
| LIM zinc-binding 1                                          | UP_SEQ_FEATURE  | 12              | 3,45       | 11,18               | 6,54E-09 |
| Intracellular non-membrane-bounded organelle                | GOTERM_CC_FAT   | 74              | 21,26      | 1,80                | 2,73E-07 |
| Non-membrane-bounded organelle                              | GOTERM_CC_FAT   | 74              | 21,26      | 1,80                | 2,73E-07 |
| Adherens junction                                           | GOTERM_CC_FAT   | 14              | 4,02       | 6,16                | 3,89E-07 |
| Cell-substrate adherens junction                            | GOTERM_CC_FAT   | 11              | 3,16       | 8,41                | 5,76E-07 |
| Aminoacyl-tRNA synthetase                                   | SP_PIR_KEYWORDS | 9               | 2,59       | 11,94               | 6,40E-07 |
| LIM zinc-binding 3                                          | UP_SEQ_FEATURE  | 8               | 2,30       | 14,33               | 8,99E-07 |
| Cell-substrate junction                                     | GOTERM_CC_FAT   | 11              | 3,16       | 7,78                | 1,23E-06 |
| Melanosome                                                  | GOTERM_CC_FAT   | 12              | 3,45       | 6,59                | 1,81E-06 |
| Pigment granule                                             | GOTERM_CC_FAT   | 12              | 3,45       | 6,59                | 1,81E-06 |
| Anchoring junction                                          | GOTERM_CC_FAT   | 14              | 4,02       | 5,31                | 2,17E-06 |
| Endoplasmic reticulum lumen                                 | GOTERM_CC_FAT   | 11              | 3,16       | 7,13                | 2,78E-06 |
| Focal adhesion                                              | GOTERM_CC_FAT   | 10              | 2,87       | 8,19                | 2,96E-06 |
| Amino acid activation                                       | GOTERM_BP_FAT   | 9               | 2,59       | 9,46                | 3,89E-06 |
| tRNA aminoacylation                                         | GOTERM_BP_FAT   | 9               | 2,59       | 9,46                | 3,89E-06 |
| tRNA aminoacylation for protein translation                 | GOTERM_BP_FAT   | 9               | 2,59       | 9,46                | 3,89E-06 |
| Prevents secretion from ER                                  | UP_SEQ_FEATURE  | 10              | 2,87       | 7,89                | 4,16E-06 |
| Ligase activity, forming carbon-oxygen bonds                | GOTERM_MF_FAT   | 9               | 2,59       | 8,99                | 5,75E-06 |
| Ligase activity, forming aminoacyl-tRNA and related co      | GOTERM_MF_FAT   | 9               | 2,59       | 8,99                | 5,75E-06 |
| Aminoacyl-tRNA ligase activity                              | GOTERM_MF_FAT   | 9               | 2,59       | 8,99                | 5,75E-06 |
| rRNA-binding                                                | SP_PIR_KEYWORDS | 6               | 1,72       | 20,70               | 6,61E-06 |
| rRNA binding                                                | GOTERM_MF_FAT   | 7               | 2,01       | 13,99               | 7,47E-06 |
| Coenzyme metabolic process                                  | GOTERM_BP_FAT   | 14              | 4,02       | 4,73                | 8,03E-06 |
| Actin-binding                                               | SP_PIR_KEYWORDS | 17              | 4,89       | 3,89                | 8,44E-06 |
| Actin binding                                               | GOTERM_MF_FAT   | 20              | 5,75       | 3,33                | 9,28E-06 |
| Ribosomal subunit                                           | GOTERM_CC_FAT   | 10              | 2,87       | 7,07                | 1,03E-05 |
| Endoplasmic reticulum, targeting sequence                   | INTERPRO        | 8               | 2,30       | 9,95                | 1,33E-05 |
| Cofactor metabolic process                                  | GOTERM_BP_FAT   | 15              | 4,31       | 3,99                | 2,46E-05 |
| Cytoskeleton                                                | SP_PIR_KEYWORDS | 28              | 8,05       | 2,49                | 2,55E-05 |
| Plasminogen activation                                      | SP_PIR_KEYWORDS | 4               | 1,15       | 51,75               | 2,80E-05 |
| Cytosolic ribosome                                          | GOTERM_CC_FAT   | 6               | 1,72       | 15,55               | 2,92E-05 |
| Basolateral plasma membrane                                 | GOTERM_CC_FAT   | 13              | 3,74       | 4,30                | 4,85E-05 |
| Cytosolic part                                              | GOTERM_CC_FAT   | 9               | 2,59       | 6,67                | 5,45E-05 |
| Posttranslational modification, protein turnover, chaperone | COG_ONTOLOGY    | 12              | 3,45       | 4,19                | 5,83E-05 |
| Lysosome                                                    | SP_PIR_KEYWORDS | 12              | 3,45       | 4,31                | 1,11E-04 |
| Endoplasmic reticulum part                                  | GOTERM_CC_FAT   | 16              | 4,60       | 3,23                | 1,32E-04 |
| Cytoskeletal protein binding                                | GOTERM_MF_FAT   | 22              | 6,32       | 2,55                | 1,53E-04 |
| Glutathione S-transferase, C-terminal-like                  | INTERPRO        | 6               | 1,72       | 10,70               | 2,12E-04 |
| Cytoplasmic membrane-bounded vesicle                        | GOTERM_CC_FAT   | 22              | 6,32       | 2,48                | 2,20E-04 |
| Membrane-bounded vesicle                                    | GOTERM_CC_FAT   | 22              | 6,32       | 2,44                | 2,68E-04 |
| Aminoacyl-tRNA biosynthesis                                 | KEGG_PATHWAY    | 8               | 2,30       | 6,07                | 2,74E-04 |
| Protein folding                                             | GOTERM_BP_FAT   | 11              | 3,16       | 4,19                | 2,95E-04 |
| Oxidation reduction                                         | GOTERM_BP_FAT   | 29              | 8,33       | 2,09                | 3,14E-04 |
| Oxidoreductase                                              | SP_PIR_KEYWORDS | 25              | 7,18       | 2,26                | 3,20E-04 |
| Small ribosomal subunit                                     | GOTERM_CC_FAT   | 6               | 1,72       | 9,65                | 3,34E-04 |
| Cell adhesion                                               | SP_PIR_KEYWORDS | 19              | 5,46       | 2,59                | 4,44E-04 |
| Zymogen                                                     | SP_PIR_KEYWORDS | 13              | 3,74       | 3,38                | 4,97E-04 |

|                                                       |                 |    |      |       |          |
|-------------------------------------------------------|-----------------|----|------|-------|----------|
| tRNA metabolic process                                | GOTERM_BP_FAT   | 10 | 2,87 | 4,28  | 5,42E-04 |
| Cytoplasmic vesicle                                   | GOTERM_CC_FAT   | 24 | 6,90 | 2,20  | 5,64E-04 |
| Concanavalin A-like lectin/glucanase, subgroup        | INTERPRO        | 8  | 2,30 | 5,56  | 5,76E-04 |
| Translation, ribosomal structure and biogenesis       | COG_ONTOLOGY    | 8  | 2,30 | 5,14  | 6,07E-04 |
| Actin cytoskeleton organization                       | GOTERM_BP_FAT   | 12 | 3,45 | 3,52  | 6,23E-04 |
| Cell junction                                         | SP_PIR_KEYWORDS | 19 | 5,46 | 2,51  | 6,32E-04 |
| GST C-terminal                                        | UP_SEQ_FEATURE  | 6  | 1,72 | 8,47  | 6,33E-04 |
| Glucose metabolic process                             | GOTERM_BP_FAT   | 11 | 3,16 | 3,80  | 6,41E-04 |
| Vesicle                                               | GOTERM_CC_FAT   | 24 | 6,90 | 2,16  | 7,52E-04 |
| Thioredoxin fold                                      | INTERPRO        | 9  | 2,59 | 4,54  | 8,27E-04 |
| Basement membrane                                     | GOTERM_CC_FAT   | 8  | 2,30 | 5,11  | 9,17E-04 |
| Sorb                                                  | SMART           | 3  | 0,86 | 56,02 | 9,28E-04 |
| Sorbin-like                                           | INTERPRO        | 3  | 0,86 | 53,50 | 1,03E-03 |
| Glutathione metabolism                                | KEGG_PATHWAY    | 8  | 2,30 | 4,90  | 1,04E-03 |
| Generation of precursor metabolites and energy        | GOTERM_BP_FAT   | 15 | 4,31 | 2,78  | 1,04E-03 |
| Actin filament-based process                          | GOTERM_BP_FAT   | 12 | 3,45 | 3,30  | 1,06E-03 |
| Cell junction                                         | GOTERM_CC_FAT   | 22 | 6,32 | 2,18  | 1,15E-03 |
| RNA-binding                                           | SP_PIR_KEYWORDS | 21 | 6,03 | 2,24  | 1,23E-03 |
| Endopeptidase activity                                | GOTERM_MF_FAT   | 20 | 5,75 | 2,28  | 1,30E-03 |
| Fibrinolysis Pathway                                  | BIOCARTA        | 4  | 1,15 | 15,82 | 1,35E-03 |
| SoHo                                                  | UP_SEQ_FEATURE  | 3  | 0,86 | 46,57 | 1,35E-03 |
| LIM zinc-binding 4                                    | UP_SEQ_FEATURE  | 4  | 1,15 | 16,94 | 1,41E-03 |
| Cellular carbohydrate catabolic process               | GOTERM_BP_FAT   | 7  | 2,01 | 5,64  | 1,43E-03 |
| Endoplasmic reticulum                                 | SP_PIR_KEYWORDS | 26 | 7,47 | 1,98  | 1,53E-03 |
| Lysosome                                              | GOTERM_CC_FAT   | 12 | 3,45 | 3,15  | 1,54E-03 |
| Pyruvate metabolism                                   | KEGG_PATHWAY    | 7  | 2,01 | 5,44  | 1,54E-03 |
| :NADP                                                 | UP_SEQ_FEATURE  | 5  | 1,44 | 9,70  | 1,56E-03 |
| Regulation of phagocytosis                            | GOTERM_BP_FAT   | 5  | 1,44 | 9,67  | 1,59E-03 |
| Lytic vacuole                                         | GOTERM_CC_FAT   | 12 | 3,45 | 3,13  | 1,61E-03 |
| RNA binding                                           | GOTERM_MF_FAT   | 27 | 7,76 | 1,93  | 1,69E-03 |
| Glutathione S-transferase, C-terminal                 | INTERPRO        | 5  | 1,44 | 9,55  | 1,70E-03 |
| NADP                                                  | SP_PIR_KEYWORDS | 10 | 2,87 | 3,64  | 1,75E-03 |
| Tropomyosin                                           | INTERPRO        | 3  | 0,86 | 40,13 | 2,03E-03 |
| Calponin                                              | INTERPRO        | 3  | 0,86 | 40,13 | 2,03E-03 |
| Class II aldolase/adducin, N-terminal                 | INTERPRO        | 3  | 0,86 | 40,13 | 2,03E-03 |
| Molecular chaperone                                   | SP_PIR_KEYWORDS | 4  | 1,15 | 14,79 | 2,20E-03 |
| Chaperone                                             | SP_PIR_KEYWORDS | 10 | 2,87 | 3,45  | 2,54E-03 |
| PINT                                                  | SMART           | 4  | 1,15 | 14,00 | 2,59E-03 |
| Hexose metabolic process                              | GOTERM_BP_FAT   | 11 | 3,16 | 3,15  | 2,65E-03 |
| Polysaccharide metabolic process                      | GOTERM_BP_FAT   | 8  | 2,30 | 4,20  | 2,89E-03 |
| Proteasome component region PCI                       | INTERPRO        | 4  | 1,15 | 13,38 | 3,00E-03 |
| Cytoskeleton organization                             | GOTERM_BP_FAT   | 16 | 4,60 | 2,37  | 3,14E-03 |
| ncRNA metabolic process                               | GOTERM_BP_FAT   | 12 | 3,45 | 2,87  | 3,16E-03 |
| Extracellular matrix part                             | GOTERM_CC_FAT   | 8  | 2,30 | 4,06  | 3,50E-03 |
| Aminoacyl-tRNA synthetase, class I, conserved site    | INTERPRO        | 5  | 1,44 | 7,87  | 3,53E-03 |
| Glutathione S-transferase/chloride channel, C-termina | INTERPRO        | 5  | 1,44 | 7,87  | 3,53E-03 |
| "KMSKS" region                                        | UP_SEQ_FEATURE  | 4  | 1,15 | 12,42 | 3,66E-03 |
| Valine, leucine and isoleucine biosynthesis           | KEGG_PATHWAY    | 4  | 1,15 | 11,59 | 4,09E-03 |
| Energy derivation by oxidation of organic compounds   | GOTERM_BP_FAT   | 8  | 2,30 | 3,95  | 4,11E-03 |
| Regulation of endocytosis                             | GOTERM_BP_FAT   | 6  | 1,72 | 5,58  | 4,23E-03 |
| Cysteine and glycine-rich protein                     | PIR_SUPERFAMILY | 3  | 0,86 | 27,36 | 4,29E-03 |
| Tropomyosin                                           | PIR_SUPERFAMILY | 3  | 0,86 | 27,36 | 4,29E-03 |
| Vacuole                                               | GOTERM_CC_FAT   | 12 | 3,45 | 2,74  | 4,42E-03 |
| Cellular glucan metabolic process                     | GOTERM_BP_FAT   | 5  | 1,44 | 7,33  | 4,51E-03 |
| Glycogen metabolic process                            | GOTERM_BP_FAT   | 5  | 1,44 | 7,33  | 4,51E-03 |
| Glucan metabolic process                              | GOTERM_BP_FAT   | 5  | 1,44 | 7,33  | 4,51E-03 |
| Protease                                              | SP_PIR_KEYWORDS | 20 | 5,75 | 2,03  | 4,80E-03 |
| 26S proteasome subunit P45                            | INTERPRO        | 3  | 0,86 | 26,75 | 4,94E-03 |
| WHEP-TRS                                              | INTERPRO        | 3  | 0,86 | 26,75 | 4,94E-03 |
| Positive regulation of endocytosis                    | GOTERM_BP_FAT   | 5  | 1,44 | 7,11  | 5,03E-03 |
| Cellular homeostasis                                  | GOTERM_BP_FAT   | 16 | 4,60 | 2,26  | 5,09E-03 |
| Soluble fraction                                      | GOTERM_CC_FAT   | 8  | 2,30 | 3,77  | 5,25E-03 |
| Protein degradation                                   | SP_PIR_KEYWORDS | 3  | 0,86 | 25,88 | 5,27E-03 |
| "HIGH" region                                         | UP_SEQ_FEATURE  | 4  | 1,15 | 10,96 | 5,29E-03 |
| Glycogen metabolism                                   | SP_PIR_KEYWORDS | 4  | 1,15 | 10,89 | 5,46E-03 |
| Cell attachment site                                  | UP_SEQ_FEATURE  | 7  | 2,01 | 4,29  | 5,73E-03 |
| Proteasome, subunit alpha/beta                        | INTERPRO        | 4  | 1,15 | 10,70 | 5,78E-03 |
| Peptidase activity                                    | GOTERM_MF_FAT   | 24 | 6,90 | 1,83  | 6,18E-03 |
| PCI                                                   | UP_SEQ_FEATURE  | 4  | 1,15 | 10,35 | 6,25E-03 |
| Monosaccharide metabolic process                      | GOTERM_BP_FAT   | 11 | 3,16 | 2,78  | 6,37E-03 |
| Rossmann-like alpha/beta/alpha sandwich fold          | INTERPRO        | 5  | 1,44 | 6,69  | 6,38E-03 |
| Carbohydrate catabolic process                        | GOTERM_BP_FAT   | 7  | 2,01 | 4,18  | 6,48E-03 |
| Redox-active center                                   | SP_PIR_KEYWORDS | 5  | 1,44 | 6,63  | 6,55E-03 |

|                                                         |                 |    |      |       |          |
|---------------------------------------------------------|-----------------|----|------|-------|----------|
| Energy reserve metabolic process                        | GOTERM_BP_FAT   | 5  | 1,44 | 6,53  | 6,83E-03 |
| Threonine protease                                      | SP_PIR_KEYWORDS | 4  | 1,15 | 9,86  | 7,29E-03 |
| Pept_C1                                                 | SMART           | 4  | 1,15 | 9,74  | 7,48E-03 |
| Peptidase activity, acting on L-amino acid peptides     | GOTERM_MF_FAT   | 23 | 6,61 | 1,83  | 7,48E-03 |
| Cofactor binding                                        | GOTERM_MF_FAT   | 12 | 3,45 | 2,55  | 7,65E-03 |
| Proteasome core complex                                 | GOTERM_CC_FAT   | 4  | 1,15 | 9,33  | 8,39E-03 |
| Peptidase C1A, papain C-terminal                        | INTERPRO        | 4  | 1,15 | 9,30  | 8,61E-03 |
| Chaperonin-containing T-complex                         | GOTERM_CC_FAT   | 3  | 0,86 | 20,00 | 8,89E-03 |
| Threonine-type endopeptidase activity                   | GOTERM_MF_FAT   | 4  | 1,15 | 9,14  | 8,94E-03 |
| Threonine-type peptidase activity                       | GOTERM_MF_FAT   | 4  | 1,15 | 9,14  | 8,94E-03 |
| Laminin G, subdomain 1                                  | INTERPRO        | 3  | 0,86 | 20,06 | 9,00E-03 |
| Calmodulin binding                                      | GOTERM_MF_FAT   | 8  | 2,30 | 3,37  | 9,65E-03 |
| Negative regulation of angiogenesis                     | GOTERM_BP_FAT   | 4  | 1,15 | 8,79  | 9,98E-03 |
| Coenzyme biosynthetic process                           | GOTERM_BP_FAT   | 6  | 1,72 | 4,53  | 1,02E-02 |
| Stress response                                         | SP_PIR_KEYWORDS | 5  | 1,44 | 5,75  | 1,08E-02 |
| Ligase                                                  | SP_PIR_KEYWORDS | 13 | 3,74 | 2,32  | 1,08E-02 |
| Intramolecular oxidoreductase activity, transposing S-  | GOTERM_MF_FAT   | 3  | 0,86 | 17,99 | 1,11E-02 |
| Protein disulfide isomerase activity                    | GOTERM_MF_FAT   | 3  | 0,86 | 17,99 | 1,11E-02 |
| Positive regulation of phagocytosis                     | GOTERM_BP_FAT   | 4  | 1,15 | 8,41  | 1,13E-02 |
| Cellular polysaccharide metabolic process               | GOTERM_BP_FAT   | 5  | 1,44 | 5,62  | 1,16E-02 |
| Lysosome                                                | KEGG_PATHWAY    | 10 | 2,87 | 2,68  | 1,16E-02 |
| Proton donor                                            | UP_SEQ_FEATURE  | 10 | 2,87 | 2,69  | 1,23E-02 |
| Cell adhesion                                           | GOTERM_BP_FAT   | 21 | 6,03 | 1,81  | 1,25E-02 |
| Glutathione metabolic process                           | GOTERM_BP_FAT   | 4  | 1,15 | 8,06  | 1,27E-02 |
| Biological adhesion                                     | GOTERM_BP_FAT   | 21 | 6,03 | 1,81  | 1,27E-02 |
| NAD or NADH binding                                     | GOTERM_MF_FAT   | 5  | 1,44 | 5,45  | 1,29E-02 |
| Sulfur metabolic process                                | GOTERM_BP_FAT   | 7  | 2,01 | 3,60  | 1,30E-02 |
| Vitamin binding                                         | GOTERM_MF_FAT   | 8  | 2,30 | 3,17  | 1,31E-02 |
| Carbohydrate metabolism                                 | SP_PIR_KEYWORDS | 6  | 1,72 | 4,25  | 1,33E-02 |
| Peptidase C1A, papain                                   | INTERPRO        | 4  | 1,15 | 7,93  | 1,35E-02 |
| Regulation of angiogenesis                              | GOTERM_BP_FAT   | 5  | 1,44 | 5,37  | 1,36E-02 |
| Intramolecular oxidoreductase activity, interconverting | GOTERM_MF_FAT   | 3  | 0,86 | 15,99 | 1,41E-02 |
| Chaperone, tailless complex polypeptide 1               | INTERPRO        | 3  | 0,86 | 16,05 | 1,41E-02 |
| Chaperonin TCP-1, conserved site                        | INTERPRO        | 3  | 0,86 | 16,05 | 1,41E-02 |
| Calmodulin-binding                                      | SP_PIR_KEYWORDS | 7  | 2,01 | 3,52  | 1,47E-02 |
| Extracellular matrix                                    | GOTERM_CC_FAT   | 14 | 4,02 | 2,11  | 1,55E-02 |
| Heat shock protein Hsp70                                | INTERPRO        | 3  | 0,86 | 14,59 | 1,70E-02 |
| Heat shock protein 70                                   | INTERPRO        | 3  | 0,86 | 14,59 | 1,70E-02 |
| Coenzyme binding                                        | GOTERM_MF_FAT   | 9  | 2,59 | 2,70  | 1,86E-02 |
| Negative regulation of neuron apoptosis                 | GOTERM_BP_FAT   | 5  | 1,44 | 4,84  | 1,94E-02 |
| Erythrocyte homeostasis                                 | GOTERM_BP_FAT   | 5  | 1,44 | 4,74  | 2,07E-02 |
| Protein kinase C binding                                | GOTERM_MF_FAT   | 3  | 0,86 | 13,08 | 2,09E-02 |
| Coenzyme catabolic process                              | GOTERM_BP_FAT   | 4  | 1,15 | 6,67  | 2,13E-02 |
| GLECT                                                   | SMART           | 3  | 0,86 | 12,93 | 2,15E-02 |
| Endoplasmic reticulum                                   | GOTERM_CC_FAT   | 28 | 8,05 | 1,56  | 2,16E-02 |
| Hexose catabolic process                                | GOTERM_BP_FAT   | 5  | 1,44 | 4,65  | 2,20E-02 |
| Glucose catabolic process                               | GOTERM_BP_FAT   | 5  | 1,44 | 4,65  | 2,20E-02 |
| Metal ion-binding site:Iron (heme proximal ligand)      | UP_SEQ_FEATURE  | 3  | 0,86 | 12,70 | 2,21E-02 |
| Iron                                                    | SP_PIR_KEYWORDS | 13 | 3,74 | 2,10  | 2,25E-02 |
| Nucleic acid-binding, OB-fold                           | INTERPRO        | 5  | 1,44 | 4,61  | 2,28E-02 |
| Protein complex binding                                 | GOTERM_MF_FAT   | 6  | 1,72 | 3,69  | 2,30E-02 |
| NAD(P)-binding domain                                   | INTERPRO        | 8  | 2,30 | 2,83  | 2,32E-02 |
| Proteasomal ubiquitin-dependent protein catabolic pr    | GOTERM_BP_FAT   | 4  | 1,15 | 6,45  | 2,33E-02 |
| Proteasomal protein catabolic process                   | GOTERM_BP_FAT   | 4  | 1,15 | 6,45  | 2,33E-02 |
| Molecular chaperone t-complex-type                      | PIR_SUPERFAMILY | 3  | 0,86 | 12,16 | 2,35E-02 |
| Galectin, carbohydrate recognition domain               | INTERPRO        | 3  | 0,86 | 12,35 | 2,36E-02 |
| Heat shock protein 70, conserved site                   | INTERPRO        | 3  | 0,86 | 12,35 | 2,36E-02 |
| Hydrogen peroxide catabolic process                     | GOTERM_BP_FAT   | 3  | 0,86 | 12,09 | 2,44E-02 |
| Cellular response to hydrogen peroxide                  | GOTERM_BP_FAT   | 3  | 0,86 | 12,09 | 2,44E-02 |
| Monosaccharide catabolic process                        | GOTERM_BP_FAT   | 5  | 1,44 | 4,48  | 2,49E-02 |
| Response to unfolded protein                            | GOTERM_BP_FAT   | 5  | 1,44 | 4,48  | 2,49E-02 |
| RNA binding                                             | SP_PIR_KEYWORDS | 3  | 0,86 | 11,94 | 2,51E-02 |
| Extracellular region part                               | GOTERM_CC_FAT   | 26 | 7,47 | 1,57  | 2,53E-02 |
| Acetyl-CoA metabolic process                            | GOTERM_BP_FAT   | 4  | 1,15 | 6,24  | 2,54E-02 |
| Proteinaceous extracellular matrix                      | GOTERM_CC_FAT   | 13 | 3,74 | 2,04  | 2,59E-02 |
| Ubl conjugation                                         | SP_PIR_KEYWORDS | 18 | 5,17 | 1,78  | 2,60E-02 |
| Cellular amino acid derivative metabolic process        | GOTERM_BP_FAT   | 8  | 2,30 | 2,74  | 2,68E-02 |
| Ubiquitin-dependent protein catabolic process           | GOTERM_BP_FAT   | 8  | 2,30 | 2,74  | 2,68E-02 |
| Chaperonin Cpn60/TCP-1                                  | INTERPRO        | 3  | 0,86 | 11,46 | 2,72E-02 |
| Basement membrane                                       | SP_PIR_KEYWORDS | 4  | 1,15 | 6,09  | 2,73E-02 |
| Cofactor catabolic process                              | GOTERM_BP_FAT   | 4  | 1,15 | 6,04  | 2,76E-02 |
| Regulation of vesicle-mediated transport                | GOTERM_BP_FAT   | 6  | 1,72 | 3,50  | 2,83E-02 |
| Platelet Amyloid Precursor Protein Pathway              | BIOCARTA        | 3  | 0,86 | 10,55 | 2,89E-02 |

|                                                         |                 |    |      |       |          |
|---------------------------------------------------------|-----------------|----|------|-------|----------|
| Protein phosphatase inhibitor                           | SP_PIR_KEYWORDS | 3  | 0,86 | 11,09 | 2,89E-02 |
| Thioredoxin-like                                        | INTERPRO        | 4  | 1,15 | 5,94  | 2,91E-02 |
| Angiogenesis                                            | SP_PIR_KEYWORDS | 5  | 1,44 | 4,17  | 3,15E-02 |
| Allosteric enzyme                                       | SP_PIR_KEYWORDS | 4  | 1,15 | 5,75  | 3,17E-02 |
| Actin cytoskeleton                                      | GOTERM_CC_FAT   | 10 | 2,87 | 2,28  | 3,21E-02 |
| Cell-cell junction                                      | GOTERM_CC_FAT   | 9  | 2,59 | 2,43  | 3,23E-02 |
| Vacuole organization                                    | GOTERM_BP_FAT   | 4  | 1,15 | 5,69  | 3,24E-02 |
| NADP metabolic process                                  | GOTERM_BP_FAT   | 3  | 0,86 | 10,36 | 3,27E-02 |
| Growth factor binding                                   | SP_PIR_KEYWORDS | 3  | 0,86 | 10,35 | 3,29E-02 |
| Oxygen binding                                          | GOTERM_MF_FAT   | 3  | 0,86 | 10,28 | 3,32E-02 |
| Response to oxidative stress                            | GOTERM_BP_FAT   | 6  | 1,72 | 3,33  | 3,37E-02 |
| Response to protein stimulus                            | GOTERM_BP_FAT   | 6  | 1,72 | 3,33  | 3,37E-02 |
| Polysome                                                | GOTERM_CC_FAT   | 3  | 0,86 | 10,00 | 3,49E-02 |
| EF-hand 5                                               | UP_SEQ_FEATURE  | 3  | 0,86 | 9,98  | 3,51E-02 |
| Contractile fiber part                                  | GOTERM_CC_FAT   | 6  | 1,72 | 3,26  | 3,68E-02 |
| Glucose-6-phosphate dehydrogenase, active site          | INTERPRO        | 2  | 0,57 | 53,50 | 3,69E-02 |
| Myristoylated alanine-rich C-kinase substrate MARCKS    | INTERPRO        | 2  | 0,57 | 53,50 | 3,69E-02 |
| Aspartic proteinase                                     | SP_PIR_KEYWORDS | 2  | 0,57 | 51,75 | 3,82E-02 |
| Cell redox homeostasis                                  | GOTERM_BP_FAT   | 5  | 1,44 | 3,90  | 3,88E-02 |
| Aminoacyl-tRNA synthetase, class II, conserved region   | INTERPRO        | 3  | 0,86 | 9,44  | 3,92E-02 |
| Cofactor biosynthetic process                           | GOTERM_BP_FAT   | 6  | 1,72 | 3,19  | 3,98E-02 |
| Repeat:1                                                | UP_SEQ_FEATURE  | 8  | 2,30 | 2,52  | 4,02E-02 |
| Positive regulation of cellular component organization  | GOTERM_BP_FAT   | 7  | 2,01 | 2,77  | 4,05E-02 |
| Pentose biosynthetic process                            | GOTERM_BP_FAT   | 2  | 0,57 | 48,36 | 4,08E-02 |
| Pinocytosis                                             | GOTERM_BP_FAT   | 2  | 0,57 | 48,36 | 4,08E-02 |
| Response to inorganic substance                         | GOTERM_BP_FAT   | 6  | 1,72 | 3,15  | 4,14E-02 |
| Regulation of cell growth                               | GOTERM_BP_FAT   | 6  | 1,72 | 3,15  | 4,14E-02 |
| Cysteine-type endopeptidase activity                    | GOTERM_MF_FAT   | 5  | 1,44 | 3,81  | 4,18E-02 |
| Cell killing                                            | GOTERM_BP_FAT   | 3  | 0,86 | 9,07  | 4,20E-02 |
| Muscle thin filament tropomyosin                        | GOTERM_CC_FAT   | 2  | 0,57 | 46,66 | 4,23E-02 |
| Proteasome regulatory particle                          | GOTERM_CC_FAT   | 2  | 0,57 | 46,66 | 4,23E-02 |
| Second luminal domain                                   | UP_SEQ_FEATURE  | 2  | 0,57 | 46,57 | 4,24E-02 |
| Cleavage; by collagenase                                | UP_SEQ_FEATURE  | 2  | 0,57 | 46,57 | 4,24E-02 |
| Beta-galactoside                                        | UP_SEQ_FEATURE  | 2  | 0,57 | 46,57 | 4,24E-02 |
| Calmodulin-binding (PSD)                                | UP_SEQ_FEATURE  | 2  | 0,57 | 46,57 | 4,24E-02 |
| RGSL                                                    | UP_SEQ_FEATURE  | 2  | 0,57 | 46,57 | 4,24E-02 |
| First luminal domain                                    | UP_SEQ_FEATURE  | 2  | 0,57 | 46,57 | 4,24E-02 |
| 7S domain                                               | UP_SEQ_FEATURE  | 2  | 0,57 | 46,57 | 4,24E-02 |
| Response to hypoxia                                     | GOTERM_BP_FAT   | 5  | 1,44 | 3,78  | 4,28E-02 |
| Peptide metabolic process                               | GOTERM_BP_FAT   | 4  | 1,15 | 5,09  | 4,30E-02 |
| SM00121: IB                                             | SMART           | 3  | 0,86 | 8,85  | 4,39E-02 |
| Repeat:2                                                | UP_SEQ_FEATURE  | 8  | 2,30 | 2,47  | 4,40E-02 |
| Internal side of plasma membrane                        | GOTERM_CC_FAT   | 12 | 3,45 | 1,95  | 4,43E-02 |
| Alcohol catabolic process                               | GOTERM_BP_FAT   | 5  | 1,44 | 3,72  | 4,49E-02 |
| Response to oxygen levels                               | GOTERM_BP_FAT   | 5  | 1,44 | 3,72  | 4,49E-02 |
| Pleckstrin homology-type                                | INTERPRO        | 11 | 3,16 | 2,04  | 4,49E-02 |
| glycosylation site: N-linked (GlcNAc...) (high mannose) | UP_SEQ_FEATURE  | 3  | 0,86 | 8,73  | 4,50E-02 |
| Myofibril                                               | GOTERM_CC_FAT   | 6  | 1,72 | 3,08  | 4,52E-02 |
| NAD                                                     | SP_PIR_KEYWORDS | 8  | 2,30 | 2,45  | 4,56E-02 |
| Pentose phosphate pathway                               | KEGG_PATHWAY    | 4  | 1,15 | 4,90  | 4,59E-02 |
| Cellular amide metabolic process                        | GOTERM_BP_FAT   | 4  | 1,15 | 4,96  | 4,59E-02 |
| Actin binding                                           | SP_PIR_KEYWORDS | 3  | 0,86 | 8,63  | 4,62E-02 |
| Extracellular space                                     | GOTERM_CC_FAT   | 18 | 5,17 | 1,64  | 4,72E-02 |
| Ubiquitin binding                                       | GOTERM_MF_FAT   | 3  | 0,86 | 8,47  | 4,76E-02 |
| Insulin-like growth factor-binding protein, IGFBP       | INTERPRO        | 3  | 0,86 | 8,45  | 4,81E-02 |
| Aldehyde dehydrogenase, N-terminal                      | INTERPRO        | 3  | 0,86 | 8,45  | 4,81E-02 |
| Aldehyde dehydrogenase                                  | INTERPRO        | 3  | 0,86 | 8,45  | 4,81E-02 |
| Antioxidant activity                                    | GOTERM_MF_FAT   | 4  | 1,15 | 4,80  | 4,98E-02 |
