# Supplementary material
Source: PubMed Central journal article supplement (PMC5192948)
Supplement: BPH-174-163-s004.pdf [file BPH-174-163-s004.pdf]

### 3 d Functional Annotation Cluster

Input proteins: 181 significantly regulated proteins

Criteria: Enrichment score > 1.5

9 functional cluster were identified, clusters are sorted by enrichment score

| <b>Annotation Cluster 1</b>                            |                 | <b>Enrichment Score: 14.94</b> |                |               |          |
|--------------------------------------------------------|-----------------|--------------------------------|----------------|---------------|----------|
| Term                                                   | Category        | Number of ter                  | % of input pro | Fold enrichme | p-value  |
| Ribosome                                               | KEGG_PATHWAY    | 24                             | 13,95          | 16,64         | 1,41E-22 |
| Ribosomal protein                                      | SP_PIR_KEYWORDS | 24                             | 13,95          | 14,24         | 7,35E-20 |
| Structural constituent of ribosome                     | GOTERM_MF_FAT   | 23                             | 13,37          | 14,15         | 3,75E-19 |
| Translation                                            | GOTERM_BP_FAT   | 29                             | 16,86          | 8,76          | 1,41E-18 |
| Ribosome                                               | GOTERM_CC_FAT   | 24                             | 13,95          | 11,84         | 2,80E-18 |
| Ribonucleoprotein                                      | SP_PIR_KEYWORDS | 26                             | 15,12          | 10,27         | 4,69E-18 |
| Ribonucleoprotein complex                              | GOTERM_CC_FAT   | 29                             | 16,86          | 5,95          | 2,88E-14 |
| Structural molecule activity                           | GOTERM_MF_FAT   | 29                             | 16,86          | 5,99          | 2,92E-14 |
| Non-membrane-bounded organelle                         | GOTERM_CC_FAT   | 41                             | 23,84          | 2,02          | 8,06E-06 |
| Intracellular non-membrane-bounded organelle           | GOTERM_CC_FAT   | 41                             | 23,84          | 2,02          | 8,06E-06 |
| <b>Annotation Cluster 2</b>                            |                 | <b>Enrichment Score: 2.99</b>  |                |               |          |
| Term                                                   | Category        | Number of ter                  | % of input pro | Fold enrichme | p-value  |
| Mitochondrion                                          | SP_PIR_KEYWORDS | 22                             | 12,79          | 2,92          | 1,89E-05 |
| Mitochondrion                                          | GOTERM_CC_FAT   | 30                             | 17,44          | 2,15          | 8,39E-05 |
| Mitochondrial part                                     | GOTERM_CC_FAT   | 17                             | 9,88           | 3,07          | 1,15E-04 |
| Transit peptide                                        | SP_PIR_KEYWORDS | 15                             | 8,72           | 3,45          | 1,17E-04 |
| Transit peptide:Mitochondrion                          | UP_SEQ_FEATURE  | 15                             | 8,72           | 3,17          | 2,78E-04 |
| Mitochondrial lumen                                    | GOTERM_CC_FAT   | 9                              | 5,23           | 5,23          | 3,13E-04 |
| Mitochondrial matrix                                   | GOTERM_CC_FAT   | 9                              | 5,23           | 5,23          | 3,13E-04 |
| Organelle inner membrane                               | GOTERM_CC_FAT   | 11                             | 6,40           | 3,34          | 1,63E-03 |
| Mitochondrial inner membrane                           | GOTERM_CC_FAT   | 10                             | 5,81           | 3,20          | 3,93E-03 |
| Mitochondrial membrane                                 | GOTERM_CC_FAT   | 11                             | 6,40           | 2,83          | 5,31E-03 |
| Mitochondrial envelope                                 | GOTERM_CC_FAT   | 11                             | 6,40           | 2,66          | 8,02E-03 |
| Organelle envelope                                     | GOTERM_CC_FAT   | 13                             | 7,56           | 2,28          | 1,11E-02 |
| Envelope                                               | GOTERM_CC_FAT   | 13                             | 7,56           | 2,27          | 1,14E-02 |
| Organelle membrane                                     | GOTERM_CC_FAT   | 14                             | 8,14           | 1,64          | 8,13E-02 |
| <b>Annotation Cluster 3</b>                            |                 | <b>Enrichment Score: 2.71</b>  |                |               |          |
| Term                                                   | Category        | Number of ter                  | % of input pro | Fold enrichme | p-value  |
| Protein biosynthesis                                   | SP_PIR_KEYWORDS | 13                             | 7,56           | 9,82          | 8,24E-09 |
| Ligase                                                 | SP_PIR_KEYWORDS | 11                             | 6,40           | 3,98          | 4,52E-04 |
| Aminoacyl-tRNA synthetase                              | SP_PIR_KEYWORDS | 5                              | 2,91           | 13,46         | 4,92E-04 |
| tRNA aminoacylation for protein translation            | GOTERM_BP_FAT   | 5                              | 2,91           | 10,47         | 1,26E-03 |
| tRNA aminoacylation                                    | GOTERM_BP_FAT   | 5                              | 2,91           | 10,47         | 1,26E-03 |
| Amino acid activation                                  | GOTERM_BP_FAT   | 5                              | 2,91           | 10,47         | 1,26E-03 |
| Ligase activity, forming aminoacyl-tRNA and related co | GOTERM_MF_FAT   | 5                              | 2,91           | 9,68          | 1,69E-03 |
| Ligase activity, forming carbon-oxygen bonds           | GOTERM_MF_FAT   | 5                              | 2,91           | 9,68          | 1,69E-03 |
| Aminoacyl-tRNA ligase activity                         | GOTERM_MF_FAT   | 5                              | 2,91           | 9,68          | 1,69E-03 |
| Aminoacyl-tRNA biosynthesis                            | KEGG_PATHWAY    | 5                              | 2,91           | 7,35          | 4,35E-03 |
| "KMSKS" region                                         | UP_SEQ_FEATURE  | 3                              | 1,74           | 18,96         | 1,05E-02 |
| "HIGH" region                                          | UP_SEQ_FEATURE  | 3                              | 1,74           | 16,73         | 1,34E-02 |
| tRNA metabolic process                                 | GOTERM_BP_FAT   | 5                              | 2,91           | 4,26          | 2,94E-02 |
| Aminoacyl-tRNA synthetase, class I, conserved site     | INTERPRO        | 3                              | 1,74           | 9,50          | 3,92E-02 |
| Rossmann-like alpha/beta/alpha sandwich fold           | INTERPRO        | 3                              | 1,74           | 8,07          | 5,26E-02 |
| ncRNA metabolic process                                | GOTERM_BP_FAT   | 6                              | 3,49           | 2,86          | 5,79E-02 |
| <b>Annotation Cluster 4</b>                            |                 | <b>Enrichment Score: 2.64</b>  |                |               |          |
| Term                                                   | Category        | Number of ter                  | % of input pro | Fold enrichme | p-value  |
| Coenzyme metabolic process                             | GOTERM_BP_FAT   | 10                             | 5,81           | 6,74          | 1,67E-05 |
| Glutathione metabolic process                          | GOTERM_BP_FAT   | 5                              | 2,91           | 20,08         | 9,77E-05 |
| Cofactor metabolic process                             | GOTERM_BP_FAT   | 10                             | 5,81           | 5,29          | 1,11E-04 |
| Peptide metabolic process                              | GOTERM_BP_FAT   | 5                              | 2,91           | 12,68         | 6,07E-04 |
| Glutathione metabolism                                 | KEGG_PATHWAY    | 6                              | 3,49           | 7,12          | 1,36E-03 |
| Sulfur metabolic process                               | GOTERM_BP_FAT   | 5                              | 2,91           | 5,13          | 1,61E-02 |
| Thioredoxin fold                                       | INTERPRO        | 5                              | 2,91           | 5,08          | 1,68E-02 |
| Coenzyme biosynthetic process                          | GOTERM_BP_FAT   | 4                              | 2,33           | 6,02          | 2,83E-02 |
| Cellular amino acid derivative metabolic process       | GOTERM_BP_FAT   | 5                              | 2,91           | 3,42          | 5,79E-02 |
| Cofactor biosynthetic process                          | GOTERM_BP_FAT   | 4                              | 2,33           | 4,24          | 6,76E-02 |
| <b>Annotation Cluster 5</b>                            |                 | <b>Enrichment Score: 1.71</b>  |                |               |          |
| Term                                                   | Category        | Number of ter                  | % of input pro | Fold enrichme | p-value  |
| Generation of precursor metabolites and energy         | GOTERM_BP_FAT   | 11                             | 6,40           | 4,06          | 3,70E-04 |
| Electron transport                                     | SP_PIR_KEYWORDS | 5                              | 2,91           | 5,25          | 1,50E-02 |
| Electron transport chain                               | GOTERM_BP_FAT   | 5                              | 2,91           | 4,30          | 2,85E-02 |
| Transport                                              | SP_PIR_KEYWORDS | 10                             | 5,81           | 0,67          | 9,67E-01 |

**Annotation Cluster 6**

| Term                          | Category      | Number of ter | % of input  | pro | Fold enrichme | p-value  |
|-------------------------------|---------------|---------------|-------------|-----|---------------|----------|
| Mitochondrial lumen           | GOTERM_CC_FAT | 9             | 5,23255814  |     | 5,23          | 3,13E-04 |
| Mitochondrial matrix          | GOTERM_CC_FAT | 9             | 5,23255814  |     | 5,23          | 3,13E-04 |
| Intracellular organelle lumen | GOTERM_CC_FAT | 18            | 10,46511628 |     | 1,50          | 8,31E-02 |
| Organelle lumen               | GOTERM_CC_FAT | 18            | 10,46511628 |     | 1,50          | 8,47E-02 |
| Membrane-enclosed lumen       | GOTERM_CC_FAT | 18            | 10,46511628 |     | 1,45          | 1,06E-01 |
| Nuclear lumen                 | GOTERM_CC_FAT | 8             | 4,651162791 |     | 0,86          | 8,26E-01 |

**Annotation Cluster 7**

| Term                                | Category        | Number of ter | % of input | pro | Fold enrichme | p-value  |
|-------------------------------------|-----------------|---------------|------------|-----|---------------|----------|
| AMP-dependent synthetase and ligase | INTERPRO        | 4             | 2,33       |     | 14,35         | 2,61E-03 |
| Fatty acid metabolism               | SP_PIR_KEYWORDS | 5             | 2,91       |     | 8,61          | 2,66E-03 |
| Fatty acid metabolism               | KEGG_PATHWAY    | 4             | 2,33       |     | 5,48          | 3,49E-02 |
| Lipid metabolism                    | SP_PIR_KEYWORDS | 5             | 2,91       |     | 3,86          | 4,04E-02 |
| Lipid metabolism                    | COG_ONTOLOGY    | 4             | 2,33       |     | 3,65          | 8,53E-02 |
| Fatty acid metabolic process        | GOTERM_BP_FAT   | 5             | 2,91       |     | 2,62          | 1,22E-01 |

**Annotation Cluster 8**

| Term                                                | Category        | Number of ter | % of input | pro | Fold enrichme | p-value  |
|-----------------------------------------------------|-----------------|---------------|------------|-----|---------------|----------|
| Acetyl-CoA metabolic process                        | GOTERM_BP_FAT   | 4             | 2,33       |     | 12,43         | 3,90E-03 |
| Citrate cycle (TCA cycle)                           | KEGG_PATHWAY    | 4             | 2,33       |     | 7,96          | 1,30E-02 |
| Tricarboxylic acid cycle                            | SP_PIR_KEYWORDS | 3             | 1,74       |     | 16,58         | 1,37E-02 |
| Energy derivation by oxidation of organic compounds | GOTERM_BP_FAT   | 5             | 2,91       |     | 4,92          | 1,85E-02 |
| Tricarboxylic acid cycle                            | GOTERM_BP_FAT   | 3             | 1,74       |     | 12,57         | 2,31E-02 |
| Acetyl-CoA catabolic process                        | GOTERM_BP_FAT   | 3             | 1,74       |     | 12,05         | 2,51E-02 |
| Aerobic respiration                                 | GOTERM_BP_FAT   | 3             | 1,74       |     | 10,71         | 3,13E-02 |
| Coenzyme catabolic process                          | GOTERM_BP_FAT   | 3             | 1,74       |     | 9,97          | 3,57E-02 |
| Cofactor catabolic process                          | GOTERM_BP_FAT   | 3             | 1,74       |     | 9,03          | 4,27E-02 |
| Cellular respiration                                | GOTERM_BP_FAT   | 3             | 1,74       |     | 4,90          | 1,24E-01 |

**Annotation Cluster 9**

| Term                                                   | Category       | Number of ter | % of input | pro | Fold enrichme | p-value  |
|--------------------------------------------------------|----------------|---------------|------------|-----|---------------|----------|
| Thioredoxin fold                                       | INTERPRO       | 5             | 2,91       |     | 5,08          | 1,68E-02 |
| Glutathione S-transferase, C-terminal-like             | INTERPRO       | 3             | 1,74       |     | 10,77         | 3,11E-02 |
| Glutathione S-transferase/chloride channel, C-terminal | INTERPRO       | 3             | 1,74       |     | 9,50          | 3,92E-02 |
| GST C-terminal                                         | UP_SEQ_FEATURE | 3             | 1,74       |     | 8,62          | 4,67E-02 |

#### 6 d Functional Annotation Cluster

Input proteins: 158 significantly regulated proteins

Criteria: Enrichment score > 1.5

12 functional cluster were identified, clusters are sorted by enrichment score

| <b>Annotation Cluster 1</b>                            |                 | <b>Enrichment Score: 12.72</b> |                |          |                  |
|--------------------------------------------------------|-----------------|--------------------------------|----------------|----------|------------------|
| Term                                                   | Category        | Number of                      | ter % of input | pro Fold | enrichme p-value |
| Ribosome                                               | KEGG_PATHWAY    | 21                             | 13,82          | 16,51    | 1,49E-19         |
| Translation                                            | GOTERM_BP_FAT   | 28                             | 18,42          | 9,86     | 2,34E-19         |
| Ribosomal protein                                      | SP_PIR_KEYWORDS | 21                             | 13,82          | 13,94    | 3,65E-17         |
| Structural constituent of ribosome                     | GOTERM_MF_FAT   | 20                             | 13,16          | 14,55    | 7,46E-17         |
| Ribosome                                               | GOTERM_CC_FAT   | 21                             | 13,82          | 11,59    | 9,61E-16         |
| Ribonucleoprotein                                      | SP_PIR_KEYWORDS | 21                             | 13,82          | 9,27     | 1,04E-13         |
| Structural molecule activity                           | GOTERM_MF_FAT   | 23                             | 15,13          | 5,61     | 7,97E-11         |
| Ribonucleoprotein complex                              | GOTERM_CC_FAT   | 23                             | 15,13          | 5,28     | 2,47E-10         |
| Intracellular non-membrane-bounded organelle           | GOTERM_CC_FAT   | 37                             | 24,34          | 2,04     | 1,87E-05         |
| Non-membrane-bounded organelle                         | GOTERM_CC_FAT   | 37                             | 24,34          | 2,04     | 1,87E-05         |
| <b>Annotation Cluster 2</b>                            |                 | <b>Enrichment Score: 3.67</b>  |                |          |                  |
| Term                                                   | Category        | Number of                      | ter % of input | pro Fold | enrichme p-value |
| Ribosome                                               | SP_PIR_KEYWORDS | 6                              | 3,95           | 30,64    | 1,20E-06         |
| Small ribosomal subunit                                | GOTERM_CC_FAT   | 4                              | 2,63           | 14,62    | 2,44E-03         |
| Ribosomal subunit                                      | GOTERM_CC_FAT   | 5                              | 3,29           | 8,03     | 3,36E-03         |
| <b>Annotation Cluster 3</b>                            |                 | <b>Enrichment Score: 2.89</b>  |                |          |                  |
| Term                                                   | Category        | Number of                      | ter % of input | pro Fold | enrichme p-value |
| LIM                                                    | SMART           | 7                              | 4,61           | 12,52    | 1,70E-05         |
| Zinc finger, LIM-type                                  | INTERPRO        | 7                              | 4,61           | 11,51    | 3,13E-05         |
| LIM domain                                             | SP_PIR_KEYWORDS | 7                              | 4,61           | 11,26    | 3,54E-05         |
| LIM zinc-binding 3                                     | UP_SEQ_FEATURE  | 5                              | 3,29           | 20,27    | 9,65E-05         |
| LIM zinc-binding 1                                     | UP_SEQ_FEATURE  | 5                              | 3,29           | 10,54    | 1,25E-03         |
| LIM zinc-binding 2                                     | UP_SEQ_FEATURE  | 5                              | 3,29           | 10,54    | 1,25E-03         |
| LIM zinc-binding 4                                     | UP_SEQ_FEATURE  | 3                              | 1,97           | 28,75    | 4,59E-03         |
| Zinc                                                   | SP_PIR_KEYWORDS | 14                             | 9,21           | 0,87     | 8,19E-01         |
| Zinc ion binding                                       | GOTERM_MF_FAT   | 15                             | 9,87           | 0,78     | 9,22E-01         |
| <b>Annotation Cluster 4</b>                            |                 | <b>Enrichment Score: 2.46</b>  |                |          |                  |
| Term                                                   | Category        | Number of                      | ter % of input | pro Fold | enrichme p-value |
| rRNA binding                                           | GOTERM_MF_FAT   | 5                              | 3,29           | 22,88    | 5,84E-05         |
| rRNA-binding                                           | SP_PIR_KEYWORDS | 4                              | 2,63           | 31,32    | 2,50E-04         |
| RNA binding                                            | GOTERM_MF_FAT   | 11                             | 7,24           | 1,80     | 8,24E-02         |
| RNA-binding                                            | SP_PIR_KEYWORDS | 8                              | 5,26           | 1,94     | 1,18E-01         |
| <b>Annotation Cluster 5</b>                            |                 | <b>Enrichment Score: 1.99</b>  |                |          |                  |
| Term                                                   | Category        | Number of                      | ter % of input | pro Fold | enrichme p-value |
| Protein biosynthesis                                   | SP_PIR_KEYWORDS | 14                             | 9,21           | 11,83    | 1,75E-10         |
| Aminoacyl-tRNA synthetase                              | SP_PIR_KEYWORDS | 6                              | 3,95           | 18,07    | 1,85E-05         |
| tRNA aminoacylation for protein translation            | GOTERM_BP_FAT   | 6                              | 3,95           | 14,65    | 5,07E-05         |
| Amino acid activation                                  | GOTERM_BP_FAT   | 6                              | 3,95           | 14,65    | 5,07E-05         |
| tRNA aminoacylation                                    | GOTERM_BP_FAT   | 6                              | 3,95           | 14,65    | 5,07E-05         |
| Aminoacyl-tRNA ligase activity                         | GOTERM_MF_FAT   | 6                              | 3,95           | 13,73    | 6,94E-05         |
| Ligase activity, forming aminoacyl-tRNA and related co | GOTERM_MF_FAT   | 6                              | 3,95           | 13,73    | 6,94E-05         |
| Ligase activity, forming carbon-oxygen bonds           | GOTERM_MF_FAT   | 6                              | 3,95           | 13,73    | 6,94E-05         |
| Aminoacyl-tRNA biosynthesis                            | KEGG_PATHWAY    | 6                              | 3,95           | 10,00    | 2,80E-04         |
| Translation, ribosomal structure and biogenesis        | COG_ONTOLOGY    | 5                              | 3,29           | 9,24     | 1,24E-03         |
| Aminoacyl-tRNA synthetase, class I, conserved site     | INTERPRO        | 4                              | 2,63           | 14,31    | 2,65E-03         |
| tRNA metabolic process                                 | GOTERM_BP_FAT   | 6                              | 3,95           | 5,96     | 3,25E-03         |
| "KMSKS" region                                         | UP_SEQ_FEATURE  | 3                              | 1,97           | 21,08    | 8,55E-03         |
| ncRNA metabolic process                                | GOTERM_BP_FAT   | 7                              | 4,61           | 3,89     | 9,02E-03         |
| "HIGH" region                                          | UP_SEQ_FEATURE  | 3                              | 1,97           | 18,60    | 1,09E-02         |
| Ligase                                                 | SP_PIR_KEYWORDS | 8                              | 5,26           | 3,24     | 1,18E-02         |
| Rossmann-like alpha/beta/alpha sandwich fold           | INTERPRO        | 3                              | 1,97           | 9,12     | 4,22E-02         |
| Nucleotide binding                                     | GOTERM_MF_FAT   | 26                             | 17,11          | 1,31     | 1,20E-01         |
| Nucleotide-binding                                     | SP_PIR_KEYWORDS | 19                             | 12,50          | 1,37     | 1,47E-01         |
| ATP-binding                                            | SP_PIR_KEYWORDS | 15                             | 9,87           | 1,37     | 2,00E-01         |
| Purine nucleotide binding                              | GOTERM_MF_FAT   | 21                             | 13,82          | 1,23     | 2,41E-01         |
| ATP                                                    | UP_SEQ_FEATURE  | 8                              | 5,26           | 1,55     | 2,55E-01         |
| Adenyl nucleotide binding                              | GOTERM_MF_FAT   | 17                             | 11,18          | 1,22     | 3,09E-01         |
| Purine nucleoside binding                              | GOTERM_MF_FAT   | 17                             | 11,18          | 1,21     | 3,22E-01         |
| Nucleoside binding                                     | GOTERM_MF_FAT   | 17                             | 11,18          | 1,20     | 3,31E-01         |
| Ribonucleotide binding                                 | GOTERM_MF_FAT   | 19                             | 12,50          | 1,16     | 3,55E-01         |
| Purine ribonucleotide binding                          | GOTERM_MF_FAT   | 19                             | 12,50          | 1,16     | 3,55E-01         |
| ATP binding                                            | GOTERM_MF_FAT   | 15                             | 9,87           | 1,14     | 4,30E-01         |

|                                                     |                               |    |               |                |               |
|-----------------------------------------------------|-------------------------------|----|---------------|----------------|---------------|
| Adenyl ribonucleotide binding                       | GOTERM_MF_FAT                 | 15 | 9,87          | 1,13           | 4,48E-01      |
| ATP                                                 | UP_SEQ_FEATURE                | 7  | 4,61          | 0,81           | 8,63E-01      |
| Protein kinase, core                                | INTERPRO                      | 3  | 1,97          | 0,74           | 9,13E-01      |
| Protein kinase                                      | UP_SEQ_FEATURE                | 3  | 1,97          | 0,66           | 9,42E-01      |
| Protein kinase activity                             | GOTERM_MF_FAT                 | 3  | 1,97          | 0,57           | 9,71E-01      |
| Kinase                                              | SP_PIR_KEYWORDS               | 3  | 1,97          | 0,50           | 9,84E-01      |
| <b>Annotation Cluster 6</b>                         | <b>Enrichment Score: 1.99</b> |    |               |                |               |
| Term                                                | Category                      |    | Number of ter | % of input pro | Fold enrichme |
| Actin cytoskeleton organization                     | GOTERM_BP_FAT                 | 7  | 4,61          | 4,76           | 3,42E-03      |
| Actin filament-based process                        | GOTERM_BP_FAT                 | 7  | 4,61          | 4,47           | 4,69E-03      |
| Cytoskeleton organization                           | GOTERM_BP_FAT                 | 7  | 4,61          | 2,41           | 6,90E-02      |
| <b>Annotation Cluster 7</b>                         | <b>Enrichment Score: 1.64</b> |    |               |                |               |
| Term                                                | Category                      |    | Number of ter | % of input pro | Fold enrichme |
| TSP1                                                | SMART                         | 4  | 2,63          | 8,97           | 9,54E-03      |
| Thrombospondin, type 1 repeat                       | INTERPRO                      | 4  | 2,63          | 8,25           | 1,24E-02      |
| TSP type-1 3                                        | UP_SEQ_FEATURE                | 3  | 1,97          | 11,71          | 2,66E-02      |
| TSP type-1 1                                        | UP_SEQ_FEATURE                | 3  | 1,97          | 8,78           | 4,51E-02      |
| TSP type-1 2                                        | UP_SEQ_FEATURE                | 3  | 1,97          | 8,78           | 4,51E-02      |
| <b>Annotation Cluster 8</b>                         | <b>Enrichment Score: 1.61</b> |    |               |                |               |
| Term                                                | Category                      |    | Number of ter | % of input pro | Fold enrichme |
| Actin binding                                       | GOTERM_MF_FAT                 | 9  | 5,92          | 3,43           | 4,58E-03      |
| Actin-binding                                       | SP_PIR_KEYWORDS               | 7  | 4,61          | 3,64           | 1,26E-02      |
| Cytoskeletal protein binding                        | GOTERM_MF_FAT                 | 10 | 6,58          | 2,65           | 1,27E-02      |
| Cytoskeleton                                        | SP_PIR_KEYWORDS               | 11 | 7,24          | 2,22           | 2,65E-02      |
| Cytoskeleton                                        | GOTERM_CC_FAT                 | 12 | 7,89          | 1,13           | 4,82E-01      |
| <b>Annotation Cluster 9</b>                         | <b>Enrichment Score: 1.59</b> |    |               |                |               |
| Term                                                | Category                      |    | Number of ter | % of input pro | Fold enrichme |
| Coenzyme metabolic process                          | GOTERM_BP_FAT                 | 7  | 4,61          | 5,50           | 1,67E-03      |
| Cofactor metabolic process                          | GOTERM_BP_FAT                 | 7  | 4,61          | 4,32           | 5,51E-03      |
| Glutathione metabolic process                       | GOTERM_BP_FAT                 | 3  | 1,97          | 14,04          | 1,88E-02      |
| Glutathione metabolism                              | KEGG_PATHWAY                  | 4  | 2,63          | 5,38           | 3,65E-02      |
| Peptide metabolic process                           | GOTERM_BP_FAT                 | 3  | 1,97          | 8,87           | 4,42E-02      |
| Cellular amino acid derivative metabolic process    | GOTERM_BP_FAT                 | 4  | 2,63          | 3,19           | 1,29E-01      |
| Sulfur metabolic process                            | GOTERM_BP_FAT                 | 3  | 1,97          | 3,58           | 2,02E-01      |
| <b>Annotation Cluster 10</b>                        | <b>Enrichment Score: 1.59</b> |    |               |                |               |
| Term                                                | Category                      |    | Number of ter | % of input pro | Fold enrichme |
| Oxidoreductase                                      | SP_PIR_KEYWORDS               | 12 | 7,89          | 2,46           | 9,43E-03      |
| Oxidation reduction                                 | GOTERM_BP_FAT                 | 13 | 8,55          | 2,17           | 1,56E-02      |
| Substrate                                           | UP_SEQ_FEATURE                | 6  | 3,95          | 2,30           | 1,19E-01      |
| <b>Annotation Cluster 11</b>                        | <b>Enrichment Score: 1.52</b> |    |               |                |               |
| Term                                                | Category                      |    | Number of ter | % of input pro | Fold enrichme |
| Cytoplasmic vesicle                                 | GOTERM_CC_FAT                 | 11 | 7,24          | 2,29           | 2,07E-02      |
| Vesicle                                             | GOTERM_CC_FAT                 | 11 | 7,24          | 2,25           | 2,36E-02      |
| Cytoplasmic membrane-bounded vesicle                | GOTERM_CC_FAT                 | 9  | 5,92          | 2,30           | 4,04E-02      |
| Membrane-bounded vesicle                            | GOTERM_CC_FAT                 | 9  | 5,92          | 2,27           | 4,33E-02      |
| <b>Annotation Cluster 12</b>                        | <b>Enrichment Score: 1.51</b> |    |               |                |               |
| Term                                                | Category                      |    | Number of ter | % of input pro | Fold enrichme |
| Coenzyme metabolic process                          | GOTERM_BP_FAT                 | 7  | 4,61          | 5,50           | 1,67E-03      |
| Cofactor metabolic process                          | GOTERM_BP_FAT                 | 7  | 4,61          | 4,32           | 5,51E-03      |
| Tricarboxylic acid cycle                            | SP_PIR_KEYWORDS               | 3  | 1,97          | 18,55          | 1,11E-02      |
| Tricarboxylic acid cycle                            | GOTERM_BP_FAT                 | 3  | 1,97          | 14,65          | 1,73E-02      |
| Acetyl-CoA catabolic process                        | GOTERM_BP_FAT                 | 3  | 1,97          | 14,04          | 1,88E-02      |
| Glyoxylate and dicarboxylate metabolism             | KEGG_PATHWAY                  | 3  | 1,97          | 13,12          | 2,08E-02      |
| Aerobic respiration                                 | GOTERM_BP_FAT                 | 3  | 1,97          | 12,48          | 2,35E-02      |
| Coenzyme catabolic process                          | GOTERM_BP_FAT                 | 3  | 1,97          | 11,62          | 2,69E-02      |
| Acetyl-CoA metabolic process                        | GOTERM_BP_FAT                 | 3  | 1,97          | 10,87          | 3,04E-02      |
| Cofactor catabolic process                          | GOTERM_BP_FAT                 | 3  | 1,97          | 10,53          | 3,23E-02      |
| Energy derivation by oxidation of organic compounds | GOTERM_BP_FAT                 | 4  | 2,63          | 4,58           | 5,58E-02      |
| Citrate cycle (TCA cycle)                           | KEGG_PATHWAY                  | 3  | 1,97          | 6,77           | 7,03E-02      |
| Cellular respiration                                | GOTERM_BP_FAT                 | 3  | 1,97          | 5,71           | 9,57E-02      |
| Coenzyme biosynthetic process                       | GOTERM_BP_FAT                 | 3  | 1,97          | 5,26           | 1,10E-01      |
| Cofactor biosynthetic process                       | GOTERM_BP_FAT                 | 3  | 1,97          | 3,70           | 1,92E-01      |
| Generation of precursor metabolites and energy      | GOTERM_BP_FAT                 | 5  | 3,29          | 2,15           | 2,00E-01      |

#### 9 d Functional Annotation Cluster

Input proteins: 363 significantly regulated proteins

Criteria: Enrichment score > 1.5

25 functional cluster were identified, clusters are sorted by enrichment score

| <b>Annotation Cluster 1</b>                            |                 | <b>Enrichment Score: 17.28</b> |                |       |               |         |
|--------------------------------------------------------|-----------------|--------------------------------|----------------|-------|---------------|---------|
| Term                                                   | Category        | Number of                      | ter % of input | pro   | Fold enrichme | p-value |
| Ribosome                                               | KEGG_PATHWAY    | 33                             | 9,48           | 11,82 | 1,28E-26      |         |
| Translation                                            | GOTERM_BP_FAT   | 44                             | 12,64          | 6,67  | 3,23E-23      |         |
| Structural constituent of ribosome                     | GOTERM_MF_FAT   | 32                             | 9,20           | 10,17 | 2,06E-22      |         |
| Ribosomal protein                                      | SP_PIR_KEYWORDS | 33                             | 9,48           | 9,65  | 3,82E-22      |         |
| Ribonucleoprotein                                      | SP_PIR_KEYWORDS | 37                             | 10,63          | 7,20  | 2,18E-20      |         |
| Ribosome                                               | GOTERM_CC_FAT   | 33                             | 9,48           | 8,02  | 7,01E-20      |         |
| Structural molecule activity                           | GOTERM_MF_FAT   | 43                             | 12,36          | 4,58  | 1,43E-16      |         |
| Ribonucleoprotein complex                              | GOTERM_CC_FAT   | 41                             | 11,78          | 4,14  | 2,85E-14      |         |
| Non-membrane-bounded organelle                         | GOTERM_CC_FAT   | 74                             | 21,26          | 1,80  | 2,73E-07      |         |
| Intracellular non-membrane-bounded organelle           | GOTERM_CC_FAT   | 74                             | 21,26          | 1,80  | 2,73E-07      |         |
| <b>Annotation Cluster 2</b>                            |                 | <b>Enrichment Score: 6.22</b>  |                |       |               |         |
| Term                                                   | Category        | Number of                      | ter % of input | pro   | Fold enrichme | p-value |
| LIM                                                    | SMART           | 14                             | 4,02           | 10,60 | 4,37E-10      |         |
| Zinc finger, LIM-type                                  | INTERPRO        | 14                             | 4,02           | 10,12 | 9,73E-10      |         |
| LIM domain                                             | SP_PIR_KEYWORDS | 14                             | 4,02           | 9,92  | 1,23E-09      |         |
| LIM zinc-binding 2                                     | UP_SEQ_FEATURE  | 12                             | 3,45           | 11,18 | 6,54E-09      |         |
| LIM zinc-binding 1                                     | UP_SEQ_FEATURE  | 12                             | 3,45           | 11,18 | 6,54E-09      |         |
| LIM zinc-binding 3                                     | UP_SEQ_FEATURE  | 8                              | 2,30           | 14,33 | 8,99E-07      |         |
| Zinc                                                   | SP_PIR_KEYWORDS | 30                             | 8,62           | 0,82  | 9,21E-01      |         |
| Zinc ion binding                                       | GOTERM_MF_FAT   | 33                             | 9,48           | 0,75  | 9,82E-01      |         |
| <b>Annotation Cluster 3</b>                            |                 | <b>Enrichment Score: 5.03</b>  |                |       |               |         |
| Term                                                   | Category        | Number of                      | ter % of input | pro   | Fold enrichme | p-value |
| Adherens junction                                      | GOTERM_CC_FAT   | 14                             | 4,02           | 6,16  | 3,89E-07      |         |
| Cell-substrate adherens junction                       | GOTERM_CC_FAT   | 11                             | 3,16           | 8,41  | 5,76E-07      |         |
| Cell-substrate junction                                | GOTERM_CC_FAT   | 11                             | 3,16           | 7,78  | 1,23E-06      |         |
| Anchoring junction                                     | GOTERM_CC_FAT   | 14                             | 4,02           | 5,31  | 2,17E-06      |         |
| Focal adhesion                                         | GOTERM_CC_FAT   | 10                             | 2,87           | 8,19  | 2,96E-06      |         |
| Basolateral plasma membrane                            | GOTERM_CC_FAT   | 13                             | 3,74           | 4,30  | 4,85E-05      |         |
| Cell junction                                          | SP_PIR_KEYWORDS | 19                             | 5,46           | 2,51  | 6,32E-04      |         |
| Cell junction                                          | GOTERM_CC_FAT   | 22                             | 6,32           | 2,18  | 1,15E-03      |         |
| <b>Annotation Cluster 4</b>                            |                 | <b>Enrichment Score: 4.40</b>  |                |       |               |         |
| Term                                                   | Category        | Number of                      | ter % of input | pro   | Fold enrichme | p-value |
| Protein biosynthesis                                   | SP_PIR_KEYWORDS | 21                             | 6,03           | 7,82  | 2,54E-12      |         |
| Aminoacyl-tRNA synthetase                              | SP_PIR_KEYWORDS | 9                              | 2,59           | 11,94 | 6,40E-07      |         |
| tRNA aminoacylation for protein translation            | GOTERM_BP_FAT   | 9                              | 2,59           | 9,46  | 3,89E-06      |         |
| tRNA aminoacylation                                    | GOTERM_BP_FAT   | 9                              | 2,59           | 9,46  | 3,89E-06      |         |
| Amino acid activation                                  | GOTERM_BP_FAT   | 9                              | 2,59           | 9,46  | 3,89E-06      |         |
| Ligase activity, forming aminoacyl-tRNA and related co | GOTERM_MF_FAT   | 9                              | 2,59           | 8,99  | 5,75E-06      |         |
| Ligase activity, forming carbon-oxygen bonds           | GOTERM_MF_FAT   | 9                              | 2,59           | 8,99  | 5,75E-06      |         |
| Aminoacyl-tRNA ligase activity                         | GOTERM_MF_FAT   | 9                              | 2,59           | 8,99  | 5,75E-06      |         |
| Aminoacyl-tRNA biosynthesis                            | KEGG_PATHWAY    | 8                              | 2,30           | 6,07  | 2,74E-04      |         |
| tRNA metabolic process                                 | GOTERM_BP_FAT   | 10                             | 2,87           | 4,28  | 5,42E-04      |         |
| ncRNA metabolic process                                | GOTERM_BP_FAT   | 12                             | 3,45           | 2,87  | 3,16E-03      |         |
| Aminoacyl-tRNA synthetase, class I, conserved site     | INTERPRO        | 5                              | 1,44           | 7,87  | 3,53E-03      |         |
| "KMSKS" region                                         | UP_SEQ_FEATURE  | 4                              | 1,15           | 12,42 | 3,66E-03      |         |
| "HIGH" region                                          | UP_SEQ_FEATURE  | 4                              | 1,15           | 10,96 | 5,29E-03      |         |
| Rossmann-like alpha/beta/alpha sandwich fold           | INTERPRO        | 5                              | 1,44           | 6,69  | 6,38E-03      |         |
| Ligase                                                 | SP_PIR_KEYWORDS | 13                             | 3,74           | 2,32  | 1,08E-02      |         |
| <b>Annotation Cluster 5</b>                            |                 | <b>Enrichment Score: 4.18</b>  |                |       |               |         |
| Term                                                   | Category        | Number of                      | ter % of input | pro   | Fold enrichme | p-value |
| Melanosome                                             | GOTERM_CC_FAT   | 12                             | 3,45           | 6,59  | 1,81E-06      |         |
| Pigment granule                                        | GOTERM_CC_FAT   | 12                             | 3,45           | 6,59  | 1,81E-06      |         |
| Cytoplasmic membrane-bounded vesicle                   | GOTERM_CC_FAT   | 22                             | 6,32           | 2,48  | 2,20E-04      |         |
| Membrane-bounded vesicle                               | GOTERM_CC_FAT   | 22                             | 6,32           | 2,44  | 2,68E-04      |         |
| Cytoplasmic vesicle                                    | GOTERM_CC_FAT   | 24                             | 6,90           | 2,20  | 5,64E-04      |         |
| Vesicle                                                | GOTERM_CC_FAT   | 24                             | 6,90           | 2,16  | 7,52E-04      |         |
| <b>Annotation Cluster 6</b>                            |                 | <b>Enrichment Score: 4.03</b>  |                |       |               |         |
| Term                                                   | Category        | Number of                      | ter % of input | pro   | Fold enrichme | p-value |
| Endoplasmic reticulum lumen                            | GOTERM_CC_FAT   | 11                             | 3,16           | 7,13  | 2,78E-06      |         |
| Prevents secretion from ER                             | UP_SEQ_FEATURE  | 10                             | 2,87           | 7,89  | 4,16E-06      |         |
| Endoplasmic reticulum, targeting sequence              | INTERPRO        | 8                              | 2,30           | 9,95  | 1,33E-05      |         |

|                                                            |                               |               |                |               |          |
|------------------------------------------------------------|-------------------------------|---------------|----------------|---------------|----------|
| Endoplasmic reticulum part                                 | GOTERM_CC_FAT                 | 16            | 4,60           | 3,23          | 1,32E-04 |
| Endoplasmic reticulum                                      | SP_PIR_KEYWORDS               | 26            | 7,47           | 1,98          | 1,53E-03 |
| Endoplasmic reticulum                                      | GOTERM_CC_FAT                 | 28            | 8,05           | 1,56          | 2,16E-02 |
| <b>Annotation Cluster 7</b>                                | <b>Enrichment Score: 3.95</b> |               |                |               |          |
| Term                                                       | Category                      | Number of ter | % of input pro | Fold enrichme | p-value  |
| Actin-binding                                              | SP_PIR_KEYWORDS               | 17            | 4,89           | 3,89          | 8,44E-06 |
| Actin binding                                              | GOTERM_MF_FAT                 | 20            | 5,75           | 3,33          | 9,28E-06 |
| Cytoskeleton                                               | SP_PIR_KEYWORDS               | 28            | 8,05           | 2,49          | 2,55E-05 |
| Cytoskeletal protein binding                               | GOTERM_MF_FAT                 | 22            | 6,32           | 2,55          | 1,53E-04 |
| Cytoskeleton                                               | GOTERM_CC_FAT                 | 33            | 9,48           | 1,37          | 5,56E-02 |
| <b>Annotation Cluster 8</b>                                | <b>Enrichment Score: 3.28</b> |               |                |               |          |
| Term                                                       | Category                      | Number of ter | % of input pro | Fold enrichme | p-value  |
| Coenzyme metabolic process                                 | GOTERM_BP_FAT                 | 14            | 4,02           | 4,73          | 8,03E-06 |
| Cofactor metabolic process                                 | GOTERM_BP_FAT                 | 15            | 4,31           | 3,99          | 2,46E-05 |
| Coenzyme biosynthetic process                              | GOTERM_BP_FAT                 | 6             | 1,72           | 4,53          | 1,02E-02 |
| Cofactor biosynthetic process                              | GOTERM_BP_FAT                 | 6             | 1,72           | 3,19          | 3,98E-02 |
| <b>Annotation Cluster 9</b>                                | <b>Enrichment Score: 2.89</b> |               |                |               |          |
| Term                                                       | Category                      | Number of ter | % of input pro | Fold enrichme | p-value  |
| Actin cytoskeleton organization                            | GOTERM_BP_FAT                 | 12            | 3,45           | 3,52          | 6,23E-04 |
| Actin filament-based process                               | GOTERM_BP_FAT                 | 12            | 3,45           | 3,30          | 1,06E-03 |
| Cytoskeleton organization                                  | GOTERM_BP_FAT                 | 16            | 4,60           | 2,37          | 3,14E-03 |
| <b>Annotation Cluster 10</b>                               | <b>Enrichment Score: 2.77</b> |               |                |               |          |
| Term                                                       | Category                      | Number of ter | % of input pro | Fold enrichme | p-value  |
| Lysosome                                                   | SP_PIR_KEYWORDS               | 12            | 3,45           | 4,31          | 1,11E-04 |
| Lysosome                                                   | GOTERM_CC_FAT                 | 12            | 3,45           | 3,15          | 1,54E-03 |
| Lytic vacuole                                              | GOTERM_CC_FAT                 | 12            | 3,45           | 3,13          | 1,61E-03 |
| Vacuole                                                    | GOTERM_CC_FAT                 | 12            | 3,45           | 2,74          | 4,42E-03 |
| Lysosome                                                   | KEGG_PATHWAY                  | 10            | 2,87           | 2,68          | 1,16E-02 |
| <b>Annotation Cluster 11</b>                               | <b>Enrichment Score: 2.58</b> |               |                |               |          |
| Term                                                       | Category                      | Number of ter | % of input pro | Fold enrichme | p-value  |
| Proteasome                                                 | SP_PIR_KEYWORDS               | 15            | 4,31           | 14,38         | 1,21E-12 |
| Proteasome complex                                         | GOTERM_CC_FAT                 | 15            | 4,31           | 12,07         | 1,28E-11 |
| Proteasome                                                 | KEGG_PATHWAY                  | 14            | 4,02           | 9,50          | 9,56E-10 |
| Protease                                                   | SP_PIR_KEYWORDS               | 20            | 5,75           | 2,03          | 4,80E-03 |
| Proteasomal ubiquitin-dependent protein catabolic process  | GOTERM_BP_FAT                 | 4             | 1,15           | 6,45          | 2,33E-02 |
| Proteasomal protein catabolic process                      | GOTERM_BP_FAT                 | 4             | 1,15           | 6,45          | 2,33E-02 |
| Ubiquitin-dependent protein catabolic process              | GOTERM_BP_FAT                 | 8             | 2,30           | 2,74          | 2,68E-02 |
| Macromolecule catabolic process                            | GOTERM_BP_FAT                 | 17            | 4,89           | 1,26          | 2,78E-01 |
| Proteolysis                                                | GOTERM_BP_FAT                 | 25            | 7,18           | 1,17          | 3,01E-01 |
| Protein catabolic process                                  | GOTERM_BP_FAT                 | 14            | 4,02           | 1,22          | 3,62E-01 |
| Cellular protein catabolic process                         | GOTERM_BP_FAT                 | 12            | 3,45           | 1,08          | 5,52E-01 |
| Cellular macromolecule catabolic process                   | GOTERM_BP_FAT                 | 13            | 3,74           | 1,03          | 6,05E-01 |
| Proteolysis involved in cellular protein catabolic process | GOTERM_BP_FAT                 | 11            | 3,16           | 1,00          | 6,67E-01 |
| Modification-dependent protein catabolic process           | GOTERM_BP_FAT                 | 9             | 2,59           | 0,86          | 8,27E-01 |
| Modification-dependent macromolecule catabolic process     | GOTERM_BP_FAT                 | 9             | 2,59           | 0,86          | 8,27E-01 |
| Ubl conjugation pathway                                    | SP_PIR_KEYWORDS               | 6             | 1,72           | 0,64          | 9,58E-01 |
| <b>Annotation Cluster 12</b>                               | <b>Enrichment Score: 2.44</b> |               |                |               |          |
| Term                                                       | Category                      | Number of ter | % of input pro | Fold enrichme | p-value  |
| PINT                                                       | SMART                         | 4             | 1,15           | 14,00         | 2,59E-03 |
| Proteasome component region PCI                            | INTERPRO                      | 4             | 1,15           | 13,38         | 3,00E-03 |
| PCI                                                        | UP_SEQ_FEATURE                | 4             | 1,15           | 10,35         | 6,25E-03 |
| <b>Annotation Cluster 13</b>                               | <b>Enrichment Score: 2.38</b> |               |                |               |          |
| Term                                                       | Category                      | Number of ter | % of input pro | Fold enrichme | p-value  |
| Cell adhesion                                              | SP_PIR_KEYWORDS               | 19            | 5,46           | 2,59          | 4,44E-04 |
| Cell adhesion                                              | GOTERM_BP_FAT                 | 21            | 6,03           | 1,81          | 1,25E-02 |
| Biological adhesion                                        | GOTERM_BP_FAT                 | 21            | 6,03           | 1,81          | 1,27E-02 |
| <b>Annotation Cluster 14</b>                               | <b>Enrichment Score: 2.30</b> |               |                |               |          |
| Term                                                       | Category                      | Number of ter | % of input pro | Fold enrichme | p-value  |
| Glucose metabolic process                                  | GOTERM_BP_FAT                 | 11            | 3,16           | 3,80          | 6,41E-04 |
| Generation of precursor metabolites and energy             | GOTERM_BP_FAT                 | 15            | 4,31           | 2,78          | 1,04E-03 |
| Hexose metabolic process                                   | GOTERM_BP_FAT                 | 11            | 3,16           | 3,15          | 2,65E-03 |
| Polysaccharide metabolic process                           | GOTERM_BP_FAT                 | 8             | 2,30           | 4,20          | 2,89E-03 |
| Energy derivation by oxidation of organic compounds        | GOTERM_BP_FAT                 | 8             | 2,30           | 3,95          | 4,11E-03 |
| Glycogen metabolic process                                 | GOTERM_BP_FAT                 | 5             | 1,44           | 7,33          | 4,51E-03 |
| Glucan metabolic process                                   | GOTERM_BP_FAT                 | 5             | 1,44           | 7,33          | 4,51E-03 |

|                                           |                 |    |      |       |          |
|-------------------------------------------|-----------------|----|------|-------|----------|
| Cellular glucan metabolic process         | GOTERM_BP_FAT   | 5  | 1,44 | 7,33  | 4,51E-03 |
| Glycogen metabolism                       | SP_PIR_KEYWORDS | 4  | 1,15 | 10,89 | 5,46E-03 |
| Monosaccharide metabolic process          | GOTERM_BP_FAT   | 11 | 3,16 | 2,78  | 6,37E-03 |
| Energy reserve metabolic process          | GOTERM_BP_FAT   | 5  | 1,44 | 6,53  | 6,83E-03 |
| Cellular polysaccharide metabolic process | GOTERM_BP_FAT   | 5  | 1,44 | 5,62  | 1,16E-02 |
| Carbohydrate metabolism                   | SP_PIR_KEYWORDS | 6  | 1,72 | 4,25  | 1,33E-02 |
| Starch and sucrose metabolism             | KEGG_PATHWAY    | 4  | 1,15 | 3,54  | 1,01E-01 |

#### Annotation Cluster 15

Enrichment Score: 2.14

| Term | Category        | Number of ter | % of input pro | Fold enrichme | p-value  |
|------|-----------------|---------------|----------------|---------------|----------|
| NADP | UP_SEQ_FEATURE  | 5             | 1,44           | 9,70          | 1,56E-03 |
| NADP | SP_PIR_KEYWORDS | 10            | 2,87           | 3,64          | 1,75E-03 |
| NADP | UP_SEQ_FEATURE  | 4             | 1,15           | 3,05          | 1,42E-01 |

#### Annotation Cluster 16

Enrichment Score: 2.11

| Term                                      | Category        | Number of ter | % of input pro | Fold enrichme | p-value  |
|-------------------------------------------|-----------------|---------------|----------------|---------------|----------|
| Protein folding                           | GOTERM_BP_FAT   | 11            | 3,16           | 4,19          | 2,95E-04 |
| Molecular chaperone                       | SP_PIR_KEYWORDS | 4             | 1,15           | 14,79         | 2,20E-03 |
| Chaperone                                 | SP_PIR_KEYWORDS | 10            | 2,87           | 3,45          | 2,54E-03 |
| Chaperonin-containing T-complex           | GOTERM_CC_FAT   | 3             | 0,86           | 20,00         | 8,89E-03 |
| Chaperone, tailless complex polypeptide 1 | INTERPRO        | 3             | 0,86           | 16,05         | 1,41E-02 |
| Chaperonin TCP-1, conserved site          | INTERPRO        | 3             | 0,86           | 16,05         | 1,41E-02 |
| Molecular chaperone t-complex-type        | PIR_SUPERFAMILY | 3             | 0,86           | 12,16         | 2,35E-02 |
| Chaperonin Cpn60/TCP-1                    | INTERPRO        | 3             | 0,86           | 11,46         | 2,72E-02 |
| Unfolded protein binding                  | GOTERM_MF_FAT   | 5             | 1,44           | 3,43          | 5,76E-02 |

#### Annotation Cluster 17

Enrichment Score: 2.07

| Term                                                | Category        | Number of ter | % of input pro | Fold enrichme | p-value  |
|-----------------------------------------------------|-----------------|---------------|----------------|---------------|----------|
| Zymogen                                             | SP_PIR_KEYWORDS | 13            | 3,74           | 3,38          | 4,97E-04 |
| Endopeptidase activity                              | GOTERM_MF_FAT   | 20            | 5,75           | 2,28          | 1,30E-03 |
| Protease                                            | SP_PIR_KEYWORDS | 20            | 5,75           | 2,03          | 4,80E-03 |
| Peptidase activity                                  | GOTERM_MF_FAT   | 24            | 6,90           | 1,83          | 6,18E-03 |
| Peptidase activity, acting on L-amino acid peptides | GOTERM_MF_FAT   | 23            | 6,61           | 1,83          | 7,48E-03 |
| Hydrolase                                           | SP_PIR_KEYWORDS | 38            | 10,92          | 1,31          | 7,13E-02 |
| Proteolysis                                         | GOTERM_BP_FAT   | 25            | 7,18           | 1,17          | 3,01E-01 |

#### Annotation Cluster 18

Enrichment Score: 1.95

| Term                                                    | Category        | Number of ter | % of input pro | Fold enrichme | p-value  |
|---------------------------------------------------------|-----------------|---------------|----------------|---------------|----------|
| Endoplasmic reticulum, targeting sequence               | INTERPRO        | 8             | 2,30           | 9,95          | 1,33E-05 |
| Redox-active center                                     | SP_PIR_KEYWORDS | 5             | 1,44           | 6,63          | 6,55E-03 |
| Intramolecular oxidoreductase activity, transposing S-S | GOTERM_MF_FAT   | 3             | 0,86           | 17,99         | 1,11E-02 |
| Protein disulfide isomerase activity                    | GOTERM_MF_FAT   | 3             | 0,86           | 17,99         | 1,11E-02 |
| Intramolecular oxidoreductase activity, interconverting | GOTERM_MF_FAT   | 3             | 0,86           | 15,99         | 1,41E-02 |
| Thioredoxin-like                                        | INTERPRO        | 4             | 1,15           | 5,94          | 2,91E-02 |
| Cell redox homeostasis                                  | GOTERM_BP_FAT   | 5             | 1,44           | 3,90          | 3,88E-02 |
| Thioredoxin domain                                      | INTERPRO        | 3             | 0,86           | 6,17          | 8,40E-02 |
| Intramolecular oxidoreductase activity                  | GOTERM_MF_FAT   | 3             | 0,86           | 3,79          | 1,86E-01 |

#### Annotation Cluster 19

Enrichment Score: 1.94

| Term                                             | Category      | Number of ter | % of input pro | Fold enrichme | p-value  |
|--------------------------------------------------|---------------|---------------|----------------|---------------|----------|
| Glutathione metabolism                           | KEGG_PATHWAY  | 8             | 2,30           | 4,90          | 1,04E-03 |
| Glutathione metabolic process                    | GOTERM_BP_FAT | 4             | 1,15           | 8,06          | 1,27E-02 |
| Sulfur metabolic process                         | GOTERM_BP_FAT | 7             | 2,01           | 3,60          | 1,30E-02 |
| Cellular amino acid derivative metabolic process | GOTERM_BP_FAT | 8             | 2,30           | 2,74          | 2,68E-02 |
| Peptide metabolic process                        | GOTERM_BP_FAT | 4             | 1,15           | 5,09          | 4,30E-02 |

#### Annotation Cluster 20

Enrichment Score: 1.91

| Term                | Category      | Number of ter | % of input pro | Fold enrichme | p-value  |
|---------------------|---------------|---------------|----------------|---------------|----------|
| Cofactor binding    | GOTERM_MF_FAT | 12            | 3,45           | 2,55          | 7,65E-03 |
| NAD or NADH binding | GOTERM_MF_FAT | 5             | 1,44           | 5,45          | 1,29E-02 |
| Coenzyme binding    | GOTERM_MF_FAT | 9             | 2,59           | 2,70          | 1,86E-02 |

#### Annotation Cluster 21

Enrichment Score: 1.86

| Term                                        | Category        | Number of ter | % of input pro | Fold enrichme | p-value  |
|---------------------------------------------|-----------------|---------------|----------------|---------------|----------|
| Basement membrane                           | GOTERM_CC_FAT   | 8             | 2,30           | 5,11          | 9,17E-04 |
| Extracellular matrix part                   | GOTERM_CC_FAT   | 8             | 2,30           | 4,06          | 3,50E-03 |
| Cell attachment site                        | UP_SEQ_FEATURE  | 7             | 2,01           | 4,29          | 5,73E-03 |
| Extracellular matrix                        | GOTERM_CC_FAT   | 14            | 4,02           | 2,11          | 1,55E-02 |
| Proteinaceous extracellular matrix          | GOTERM_CC_FAT   | 13            | 3,74           | 2,04          | 2,59E-02 |
| Basement membrane                           | SP_PIR_KEYWORDS | 4             | 1,15           | 6,09          | 2,73E-02 |
| Extracellular matrix                        | SP_PIR_KEYWORDS | 9             | 2,59           | 2,19          | 5,47E-02 |
| Extracellular matrix structural constituent | GOTERM_MF_FAT   | 3             | 0,86           | 4,80          | 1,28E-01 |

| <b>Annotation Cluster 22</b>                                       |                 | <b>Enrichment Score: 1.79</b> |            |                     |          |
|--------------------------------------------------------------------|-----------------|-------------------------------|------------|---------------------|----------|
| Term                                                               | Category        | Number of terms               | % of input | pro Fold enrichment | p-value  |
| Proteasome, subunit alpha/beta                                     | INTERPRO        | 4                             | 1,15       | 10,70               | 5,78E-03 |
| Threonine protease                                                 | SP_PIR_KEYWORDS | 4                             | 1,15       | 9,86                | 7,29E-03 |
| Proteasome core complex                                            | GOTERM_CC_FAT   | 4                             | 1,15       | 9,33                | 8,39E-03 |
| Threonine-type endopeptidase activity                              | GOTERM_MF_FAT   | 4                             | 1,15       | 9,14                | 8,94E-03 |
| Threonine-type peptidase activity                                  | GOTERM_MF_FAT   | 4                             | 1,15       | 9,14                | 8,94E-03 |
| Proteolysis involved in cellular protein catabolic process         | GOTERM_BP_FAT   | 11                            | 3,16       | 1,00                | 6,67E-01 |
| <b>Annotation Cluster 23</b>                                       |                 | <b>Enrichment Score: 1.78</b> |            |                     |          |
| Term                                                               | Category        | Number of terms               | % of input | pro Fold enrichment | p-value  |
| Stress response                                                    | SP_PIR_KEYWORDS | 5                             | 1,44       | 5,75                | 1,08E-02 |
| Heat shock protein 70                                              | INTERPRO        | 3                             | 0,86       | 14,59               | 1,70E-02 |
| Heat shock protein Hsp70                                           | INTERPRO        | 3                             | 0,86       | 14,59               | 1,70E-02 |
| Heat shock protein 70, conserved site                              | INTERPRO        | 3                             | 0,86       | 12,35               | 2,36E-02 |
| <b>Annotation Cluster 24</b>                                       |                 | <b>Enrichment Score: 1.74</b> |            |                     |          |
| Term                                                               | Category        | Number of terms               | % of input | pro Fold enrichment | p-value  |
| Glucose metabolic process                                          | GOTERM_BP_FAT   | 11                            | 3,16       | 3,80                | 6,41E-04 |
| Cellular carbohydrate catabolic process                            | GOTERM_BP_FAT   | 7                             | 2,01       | 5,64                | 1,43E-03 |
| Hexose metabolic process                                           | GOTERM_BP_FAT   | 11                            | 3,16       | 3,15                | 2,65E-03 |
| Monosaccharide metabolic process                                   | GOTERM_BP_FAT   | 11                            | 3,16       | 2,78                | 6,37E-03 |
| Carbohydrate catabolic process                                     | GOTERM_BP_FAT   | 7                             | 2,01       | 4,18                | 6,48E-03 |
| Glucose catabolic process                                          | GOTERM_BP_FAT   | 5                             | 1,44       | 4,65                | 2,20E-02 |
| Hexose catabolic process                                           | GOTERM_BP_FAT   | 5                             | 1,44       | 4,65                | 2,20E-02 |
| Monosaccharide catabolic process                                   | GOTERM_BP_FAT   | 5                             | 1,44       | 4,48                | 2,49E-02 |
| Alcohol catabolic process                                          | GOTERM_BP_FAT   | 5                             | 1,44       | 3,72                | 4,49E-02 |
| Glycolysis / Gluconeogenesis                                       | KEGG_PATHWAY    | 6                             | 1,72       | 2,81                | 6,01E-02 |
| Carbohydrate transport and metabolism                              | COG_ONTOLOGY    | 3                             | 0,86       | 4,16                | 1,56E-01 |
| Glycolysis                                                         | SP_PIR_KEYWORDS | 3                             | 0,86       | 3,70                | 1,94E-01 |
| Glycolysis                                                         | GOTERM_BP_FAT   | 3                             | 0,86       | 3,30                | 2,30E-01 |
| <b>Annotation Cluster 25</b>                                       |                 | <b>Enrichment Score: 1.68</b> |            |                     |          |
| Term                                                               | Category        | Number of terms               | % of input | pro Fold enrichment | p-value  |
| Glutathione S-transferase, C-terminal-like                         | INTERPRO        | 6                             | 1,72       | 10,70               | 2,12E-04 |
| GST C-terminal                                                     | UP_SEQ_FEATURE  | 6                             | 1,72       | 8,47                | 6,33E-04 |
| Glutathione metabolism                                             | KEGG_PATHWAY    | 8                             | 2,30       | 4,90                | 1,04E-03 |
| Glutathione S-transferase, C-terminal                              | INTERPRO        | 5                             | 1,44       | 9,55                | 1,70E-03 |
| Glutathione S-transferase/chloride channel, C-terminal             | INTERPRO        | 5                             | 1,44       | 7,87                | 3,53E-03 |
| GST N-terminal                                                     | UP_SEQ_FEATURE  | 3                             | 0,86       | 6,35                | 7,97E-02 |
| Glutathione S-transferase, N-terminal                              | INTERPRO        | 3                             | 0,86       | 5,94                | 8,96E-02 |
| Glutathione transferase                                            | PIR_SUPERFAMILY | 3                             | 0,86       | 5,76                | 9,36E-02 |
| Glutathione transferase activity                                   | GOTERM_MF_FAT   | 3                             | 0,86       | 5,54                | 1,01E-01 |
| Transferase activity, transferring alkyl or aryl (other than acyl) | GOTERM_MF_FAT   | 3                             | 0,86       | 2,72                | 3,02E-01 |
| Metabolism of xenobiotics by cytochrome P450                       | KEGG_PATHWAY    | 3                             | 0,86       | 1,45                | 6,16E-01 |
| Drug metabolism                                                    | KEGG_PATHWAY    | 3                             | 0,86       | 1,28                | 6,85E-01 |
